1 **Title** Autogenous and anautogenous *Culex pipiens* bioforms exhibit insulin-like peptide signaling  
2 pathway gene expression differences that are not dependent upon larval nutrition

3 **Running Title** Nutrition and ILP expression in *Cx. pipiens* autogeny

4 Alys M. Cheatle Jarvela<sup>1</sup>, Katherine L. Bell<sup>1</sup>, Anna Noreuil<sup>1</sup>, and Megan L. Fritz<sup>1,2\*</sup>

5 <sup>1</sup> Department of Entomology, University of Maryland College Park, 4112 Plant Sciences  
6 Building, College Park, MD 20042

7 <sup>2</sup> Institute for Advanced Computer Studies, University of Maryland College Park

8 \*corresponding author

9

10 **Acknowledgements** We thank the University of Maryland's Department of Cell Biology and  
11 Molecular Genetics Imaging Core for the use of their Roche LightCycler qPCR machine and  
12 Amy Beaven for expert training on the instrument. Thea Bliss conducted the wing  
13 measurements. We thank Leslie Pick (LP; UMD Dept of Entomology) for thoughtful discussions  
14 during the initial stages of this project. Kevin Vogel reviewed and provided constructive  
15 feedback on an early draft of our manuscript. AMCJ received support from NIH R01GM113230  
16 to LP. This work was funded by University of Maryland startup funds and NIH R01AI125622A to  
17 MLF.

18 **Article Type** Original Article

19

20

21 **Abstract**

22 *Culex pipiens* form *pipiens* and *Cx. pipiens* form *molestus* differ in their ability to produce eggs  
23 without a bloodmeal. Autogenous mosquitoes, such as the *molestus* bioform of *Cx. pipiens*,  
24 depend on nutrition acquired as larvae instead of a bloodmeal to fuel the energy intensive  
25 process of vitellogenesis, which requires abundant production of yolk proteins. In  
26 anautogenous mosquito systems, ovary ecdysteroidogenic hormone (OEH) and insulin-like  
27 peptides (ILPs) transduce nutritional signals and trigger egg maturation in response to a  
28 bloodmeal. It is unclear to what extent the process is conserved in autogenous mosquitoes and  
29 how the bloodmeal trigger has been replaced by teneral reserves. Here, we measured the  
30 effects of a series of nutritional regimens on autogeny, time to pupation, and survival in *Cx.*  
31 *pipiens* form *molestus* and form *pipiens*. We find that abundant nutrients never result in  
32 autogenous form *pipiens* and extremely poor food availability rarely eliminates autogeny from  
33 form *molestus*. However, the number of autogenous eggs generated increases with nutrient  
34 availability. Similarly, using qPCR to quantify gene expression, we find several differences in the  
35 expression levels of *ilps* between bioforms that are reduced and delayed by poor nutrition, but  
36 not extinguished. Changes in *OEH* expression do not explain bioform-specific differences in  
37 autogeny. Surprisingly, the source of most of the gene expression differences correlated with  
38 autogeny is the abdomen, not the brain. Overall, our results suggest that autogeny is  
39 modulated by nutritional availability, but the trait is encoded by genetic differences between  
40 forms and these impact the expression of ILPs.

41 **Keywords** insulin-like peptides, *Culex pipiens*, form *molestus*, form *pipiens*, autogeny

42

## 43 **Introduction**

44           Blood is a requirement for egg production in most mosquito vectors of disease, and  
45 acquisition of blood drives pathogen transmission. This reproductive strategy is known as  
46 anautogeny. Yet egg production in the absence of a blood meal, or autogeny, has been  
47 described in dozens of mosquito species (Vinogradova, 2000). Autogeny can be obligatory,  
48 where females always lay their first (and, in some species, subsequent) batches of eggs without  
49 a blood meal, or facultative, where females may lay an autogenous egg raft dependent on their  
50 larval environmental conditions (Attardo et al., 2005; Provost-Javier et al., 2010; Tsuji et al.,  
51 1990). While it is well-established that autogenous reproduction is under genetic control  
52 (Aslamkhan and Laven, 1970; Krishnamurthy and Laven, 1961; Mori et al., 2008; O'Meara et  
53 al., 1969; Spielman, 1957; Trpis, 1978), the molecular basis for this unique reproductive  
54 strategy remains unknown. Comparing the molecular and physiological tradeoffs underlying  
55 autogenous and anautogenous reproduction has strong potential to elucidate the key genetic  
56 changes that led to multiple instances of reproductive divergence within and among mosquito  
57 species (O'Meara, 1985).

58           Due to its epidemiological relevance, the reproductive physiology of anautogenous  
59 mosquitoes has been investigated extensively. Egg development requires that yolk proteins  
60 produced by the fat body are deposited into developing oocytes, a process known as  
61 vitellogenesis. In anautogenous mosquitoes, vitellogenesis is tightly suppressed until a blood  
62 meal is obtained (reviewed in Attardo et al., 2005; Hansen et al., 2014). Four key signaling  
63 pathways, juvenile hormone III (JH), ecdysone, insulin-signaling, and target of rapamycin  
64 (TOR), interact to regulate the expression of yolk protein precursors (YPPs) in the fat body,  
65 vitellogenesis, and ovarian maturation (reviewed in Attardo et al., 2005; Hansen et al., 2014).  
66 JH acts on the fat body and ovaries during maturation, influencing the ability of a female to  
67 activate *YPP* genes (Noriega, 2004; Zou et al., 2013). Once a female obtains a blood meal, the  
68 steroid hormone ecdysone is the major hormone that regulates egg maturation via activation of

69 target genes, such as the predominant *YPP* gene, *vitellogenin (Vg)* (reviewed in Roy et al.,  
70 2016). Ecdysone is regulated synergistically by ovary ecdysteroidogenic hormone (OEH) and  
71 insulin-signaling. After feeding, stretch receptors in the gut trigger the release of OEH from the  
72 brain into the hemolymph, which stimulates the production and release of ecdysone by follicle  
73 cells of the ovary (Dhara et al., 2013; Hagedorn et al., 1979, 1975). Insulin-like peptides (ILPs),  
74 a group of evolutionarily conserved peptide hormones, may also influence *YPP* gene expression  
75 both directly and indirectly (Hansen et al., 2014). Together, insulin pathway and ecdysone  
76 signaling activate *YPP* expression in the fat body (Roy et al., 2007). In *Aedes aegypti*, one  
77 member of the insulin-like peptide family, ILP3, has been demonstrated to be essential for the  
78 production of ecdysone, providing indirect reinforcement of *YPP* expression (Brown et al., 2008,  
79 Dhara et al. 2013, Vogel et al. 2015). ILP3 also stimulates serine protease activity in the midgut  
80 for blood meal digestion, contributing to the availability of amino acids required to produce YPPs  
81 (Gulia-Nuss et al., 2012). The TOR signaling pathway detects these increases in amino acid  
82 levels and contributes to the activation of *YPP* gene expression (Hansen et al., 2004).  
83 Ultimately, vitellogenesis is not initiated in anautogenous females until these nutrient sensing  
84 pathways signal the availability of yolk building blocks after a blood meal.

85 In contrast to anautogenous reproduction, the physiology of ovarian maturation in  
86 autogenous mosquitoes has received less attention (Gulia-Nuss et al., 2015, 2012; Kassim et  
87 al., 2012; Provost-Javier et al., 2010). One of the most well-studied autogenous species is the  
88 rockpool mosquito, *Georgescraigius atropalpus* (formerly *Aedes* and *Ochlerotatus*)(Gulia-Nuss et  
89 al., 2015, 2012; Telang et al., 2013, 2006). *G. atropalpus* females that are decapitated within 6  
90 hours of pupal emergence fail to initiate vitellogenesis, demonstrating that hormones secreted  
91 from the brain are critical to autogenous reproduction in this species. When injected, OEH fully  
92 restores and ILP3 partially restores reproductive maturation in these decapitated females  
93 (Gulia-Nuss et al., 2012), demonstrating that the roles of these hormones in *G. atropalpus* are

94 analogous to what has been found in the primarily anautogenous *Ae. aegypti* after they have  
95 acquired a blood meal.

96 In *G. atropalpus* and other autogenous mosquitoes, nutritional status interacts with  
97 genetic factors, including those underlying hormonal secretion from the brain, to influence  
98 autogenous egg production. Females emerging from crowded, or nutrient poor larval habitats  
99 may fail to reproduce autogenously or have low fecundity (Kassim et al., 2012; Krishnamurthy  
100 and Laven, 1961; Lounibos et al., 1982; O'Meara and Krasnick, 1970; Trpis, 1978). Such  
101 nutritional control of trait expression is observed in other insect species (Casasa and Moczek,  
102 2018; Chandra et al., 2018; Wheeler and Frederik Nijhout, 1983), and in some cases, the  
103 molecular mechanism underlying this nutritional regulation is known. For example, horn size in  
104 taurus scarab beetles (*Onthophagus taurus*) is dependent on nutritional state, which is  
105 transduced by insulin signaling (Casasa and Moczek, 2018). In ants, upregulation of *insulin-like*  
106 *peptide 2 (ilp2)* occurs in reproductive as opposed to non-reproductive individuals and larval  
107 nutrition can influence adult ILP2 expression levels (Chandra et al., 2018). In these and other  
108 examples, an emerging theme is that insulin signaling is a critical component of the mechanism  
109 that ties phenotype to nutritional status (reviewed in Nijhout and McKenna, 2018). In  
110 autogenous mosquitoes, it is unclear how and whether the nutritional state of females impacts  
111 the expression of ILPs and other genes underlying induction of vitellogenesis and ovarian  
112 maturation.

113 Here, we examine the interaction between nutrition, gene expression, and ovarian  
114 maturation in a species of mosquito which is polymorphic for autogeny, *Culex pipiens*. Within  
115 the species, there are two interfertile and morphologically indistinguishable bioforms that exhibit  
116 divergent reproductive strategies (*Culex pipiens* form *pipiens* and form *molestus*, hereafter  
117 *pipiens* and *molestus*) (Harbach et al., 1984; Spielman, 2001; Spielman and Wong, 1973). The  
118 form *molestus* is thought to be facultatively autogenous, while the form *pipiens* is anautogenous  
119 (Roubaud, 1929). Although these populations are genetically distinct (Fonseca et al., 2004;

120 Kent et al., 2007; Yurchenko et al., 2020), the molecular mechanisms underlying their divergent  
121 reproductive strategies have not been identified.

122 We begin to address this knowledge gap by quantifying changes in expression of key  
123 nutrient-sensing pathway genes for the autogenous *molestus*, as compared to the  
124 anaautogenous *pipiens*. Multiple genes previously demonstrated to play a critical role in ovarian  
125 maturation, including *oeh*, the full suite of *ilps*, their downstream effector *foxo*, as well as *Vg1b*,  
126 were examined for expression level differences in female heads and abdomens for four days  
127 following adult emergence. We also measured gene expression in females that experienced  
128 nutrient rich and poor larval conditions, which produced dramatic changes in time spent as  
129 larvae and fecundity in autogenous *molestus*. Expression patterns for several of these genes  
130 differed temporally, by form, and in a body segment specific way. Interestingly, insulin-signaling  
131 pathway genes whose expression differed by form also show delayed or dampened expression  
132 in poorly-fed *molestus* individuals, but never matched the expression levels observed in well-fed  
133 *pipiens*. This demonstrates the relatively greater importance of genotype over nutrition in  
134 autogenous egg production for *Cx. pipiens*. Furthermore, this work establishes a system that  
135 will allow investigation of the key genetic variants which halt ovarian maturation in some females  
136 yet facilitate it in others. Such variants would make attractive targets for novel genetic control  
137 measures that limit ovarian maturation, egg production, and ultimately vector population growth.

138

## 139 **Results and Discussion**

140 *Bioinformatic and phylogenetic analyses reveal six Culex ilp orthologs*

141 At the start of this work, three *ilps* had been identified in *Cx. pipiens* (named *ilp1*, *ilp2*,  
142 and *ilp5*) (Sim and Denlinger, 2009), but based on the numbers in *Aedes aegypti* (n = 8; (Riehle  
143 et al., 2006)), *Anopheles gambiae* (n = 5; (Riehle et al., 2002)), *Anopheles stephensi* (n = 5;  
144 (Marquez et al., 2011)), and *Drosophila melanogaster* (n = 8; Brogiolo et al., 2001; Colombani et  
145 al., 2012; Garelli et al., 2012; Grönke et al., 2010), it was predicted that more remained to be

146 discovered (Sharma et al., 2019; Sim and Denlinger, 2009). We identified six *Culex ilp* genes  
147 by performing a HMMR analysis in Vectorbase using an alignment of all eight *Drosophila* and  
148 *Aedes ilps* against the CpipJ2.4 geneset. A phylogenetic analysis of these six *Culex* ILPs  
149 determined their orthology to established sequences from *Drosophila*, *Aedes*, and *Anopheles*  
150 (Fig. 1). We confirmed the identity of previously isolated *Cpip-ilp1* and *-ilp5* genes, as well as  
151 those from the *Culex quinquefasciatus* Johannesburg genome that were included in other's  
152 phylogenetic analyses (Marquez et al., 2011; Sim and Denlinger, 2009). One gene previously  
153 named *Cpip-ilp2* (Genbank accession ACM66967.1) was orthologous to *ilp3* in other mosquito  
154 species. Comparison of "*Cpip-ilp2*" to *Cqui-ilp2* and *Cqui-ilp3* further supports its orthology with  
155 *ilp3* (Fig. S1). Therefore, we refer to this sequence as *Cpip-ilp3* in this work.

156 One new *ilp* gene was identified and had likely been overlooked in previous work  
157 because it is unique to *Culex* (XP\_001868260.1). We named this gene *ilp4* because it is  
158 syntenic with *ilps 1-3*, as is the case in other Dipteran genomes (Fig. S2). It is not a clear  
159 ortholog of any other Dipteran *ilp4*, however, and likely arose by a lineage-specific gene  
160 duplication event. All of the genes in this syntenic cluster have sequence features that define  
161 them as "insulin-like peptides", such as a long, cleavable C peptide (Okamoto and Yamanaka,  
162 2015). *Cpip-ilp5* and other mosquito *ilp5* orthologs are not syntenic in the genome with other *ilps*  
163 and contain distinct sequence features that define them as orthologs of *Dmel-ilp7* (Krieger et al.,  
164 2004; Okamoto and Yamanaka, 2015; Riehle et al., 2006). Our phylogenetic analysis upholds  
165 this grouping (Fig. 1). Similarly, *Cqui-ilp6* is in a clade with *Aaeg-ilp6* in our analysis and both  
166 are located elsewhere in the genome, not in a syntenic cluster with other ILP genes. This is  
167 also true for *Dmel-ilp6*, which is considered "IGF-like" based on sequence features such as its  
168 short C peptide. Although our phylogeny does not group mosquito *ilp6* genes with *Dmel-ilp6*,  
169 the short C peptides, extended C-terminus following the A domain, and genomic locations  
170 suggest that they can also be considered "IGF-like" genes (Riehle et al., 2006). In sum, there

171 are six *ilp* genes in *Cx. pipiens* assemblage species: *ilps1-4* are true insulin-like peptides, *ilp5* is  
172 similar to *Drosophila*'s atypical *ilp7*, and *ilp6* is best described as an IGF-like peptide.

173

174 *Autogenic ovarian maturation is enhanced by a nutrient rich larval environment*

175 Prior to quantifying gene expression, we confirmed that the timing and degree of *Culex*  
176 ovarian maturation was consistent with previous observations of autogenous and anautogenous  
177 mosquito populations. Dissections of adult *molestus* and *pipiens* females conducted over 96h  
178 post emergence (PE) showed that ovarian maturation in *molestus* progressed beyond that of  
179 *pipiens* by 48h PE and was complete by 96h PE, regardless of mating status (Fig. 2). Failure of  
180 mating status to impact autogenous ovarian maturation agreed well with previous studies of  
181 another *molestus* population and *G. atropalpus* (Gulia-Nuss et al., 2012; Kassim et al., 2012;  
182 Spielman, 1957). Furthermore, our time course of ovarian maturation was consistent with  
183 studies showing *molestus* follicle length reaches its maximum between 80-105h post-  
184 emergence (Spielman, 1957), and egg deposition begins at 120h (Kassim et al., 2012).

185 Nutrient rich and poor aquatic environments are known to impact body size, larval  
186 development, mortality, and egg production in autogenous mosquitoes (Kassim et al., 2012;  
187 Lounibos et al., 1982; O'Meara and Krasnick, 1970; Telang and Wells, 2004). Here, we  
188 examined both anautogenous *pipiens* and autogenous *molestus* for these traits in a  
189 comparative framework under identical environmental conditions. Rather than rearing larvae  
190 together in the same environment, as was previously done (Kassim et al., 2012; Spielman,  
191 1957), we reared each larva in a single well of cell culture plate to avoid the confounding effects  
192 of competition on trait expression. Each larva was consistently fed one of four diet treatments  
193 ranging from 0.25mg desiccated liver powder (LP) + 0.14mg dry yeast (DY) per larva (extra-low)  
194 to 1.07mg LP + 0.53mg DY (high) every other day. For both forms, larval survivorship was high  
195 (> 85%) and did not differ by diet treatment (Fig. S3; Tables S1 & S2). Wing length, which  
196 serves as a proxy measure of female body size and teneral reserves (Telang et al., 2006) was



197 positively correlated with larval nutrient availability, however (Table 1; Tables S3 & S4).

198 Together, this indicated that our diet treatments effectively manipulated larval nutrition without  
199 inducing mortality.

200 As expected based on previous work (Attardo et al., 2005), larval development time was  
201 negatively correlated with nutrient availability for both forms (Fig. S4; Tables S5 & S6). When  
202 fed the highest diet treatment, form *pipiens* and *molestus* larvae developed at similar rates  
203 (Tables S5 & S7), where mean days to pupation were 7.2 (s.d. = 0.8, n = 208) and 7.8 (s.d. 1.1,  
204 n = 222), respectively. At the lowest diet treatments, larval development times lengthened to  
205 10.2 (s.d. = 1.9, n = 202) and 13.1 (s.d. 2.6, n = 200) days, respectively, and there was higher  
206 variation in development time for *molestus*. We reasoned that sex-specific differences in  
207 nutrient acquisition, particularly for *molestus*, could account for this additional variation. In a  
208 separate experiment, we quantified male and female development times for both *molestus* and  
209 *pipiens*, and our results revealed a three-way interaction between sex, form, and diet treatment  
210 (Fig. 3; Table S8 & S9). Female *molestus* larvae compensated for very low nutrient availability  
211 by lengthening their development time beyond what we observed for *pipiens* females and males  
212 of both forms (Fig. 3). This was consistent with previous studies of autogenous mosquitoes  
213 (Lounibos et al. 1982, Kassim et al. 2012), but unlike our results, *molestus* larvae from previous  
214 studies suffered increased mortality (up to 38.7%), likely due to the more severe starvation  
215 conditions imposed for the lowest diet treatments (Kassim et al., 2012).

216 Ovarian dissections revealed that larval nutrition was positively correlated with the  
217 numbers of elongated follicles produced by each *molestus* female (Tables S10 & S11), while  
218 *pipiens* females never showed signs of ovarian maturation (Table S12). Form *molestus* females  
219 raised at the highest diet treatment matured, on average, 47.6 (s.d. = 14.3, n = 62) follicles  
220 whereas those from the lowest diet treatment matured only 14.3 (s.d. = 9.6, n = 51; Table S12,  
221 Fig. S4). We also quantified the probability that *molestus* females failed to produce any mature  
222 follicles according to diet treatment. From the highest to lowest diet treatment, 1.6 %, 3.2%,

223 2.8% and 19.6% of *molestus* females showed no signs of ovarian maturation. Our statistical  
224 analysis indicated that the lowest diet treatment had greater potential to halt ovarian maturation  
225 in *molestus* females than did the other diet treatments (Tables S13 & S14), confirming that  
226 expression of autogeny is the result of a genotype by environment interaction. Finally, our  
227 observation that poorly nourished *molestus* females lengthened larval development time led us  
228 to quantify the relationship between time spent as larvae and the numbers of elongated follicles  
229 produced. We tested for a positive correlation between development time and numbers of  
230 elongated follicles produced by females reared under the low and extra low diet treatments but  
231 found little evidence of this (Fig. S5; Tables S15 & S16).

232         Altogether, these results support and add to previous work, showing that autogenic  
233 follicle development in *Culex* is a form-specific trait that is quantitatively impacted and  
234 sometimes eliminated by larval diet (Fig. S4). Poor nutritional conditions lengthen larval  
235 development in a pronounced, sex-specific way for autogenous female *molestus*, compared to  
236 anautogenous *pipiens* reared under identical conditions (Fig. 3; Table S8). Yet increased larval  
237 development time does not necessarily result in strong increases in the numbers of elongated  
238 follicles produced by poorly nourished females. These results suggest there is a threshold level  
239 of nutrient acquisition that must be met prior to pupation in autogenous *molestus* females. In  
240 our hands, when nutritional requirements were met and female *molestus* pupated, most initiated  
241 follicle maturation upon eclosion. Extended larval development times observed for *molestus*  
242 females appeared to be more important for progression from larva to pupa than for increasing  
243 reproductive output, however (Fig. S5).

244

245 *Gene expression changes associated with autogeny are frequently observed in abdominal*  
246 *tissue samples and are damped or delayed under poor nutritional conditions*

247         After observing significant, yet non-lethal impacts of diet on larval development and  
248 reproduction in our *Culex* forms, we compared the expression patterns of nine genes involved in

249 nutrient-sensing and ovarian maturation for females raised under nutrient rich and poor  
250 conditions using our previous experimental design. These gene candidates included *ilps 1-6*,  
251 *foxo*, *Vg1b*, and *oeh*. Autogenous *molestus* and anautogenous *pipiens* were reared individually  
252 under the highest or lowest diet treatments as described above, and non-bloodfed females were  
253 collected at 24-hour intervals PE in groups of ten, according to form and diet treatment. Heads  
254 and abdomens were divided into pooled tissue samples for RNA extraction, cDNA synthesis,  
255 and qPCR analysis. Relative fold changes in gene expression are reported with respect to 0-  
256 24h PE well-fed form *pipiens* (Fig. 4-6). Statistical significance of fold change differences  
257 between forms for each time point were always examined by two-way ANOVA corrected for  
258 multiple comparisons. This also allowed us to assess significance of fold change differences  
259 between nutritional regimens within a bioform. With two discussed exceptions, we found no  
260 significant differences associated with diet treatment.

261 Previous work suggested that insulin signaling is an attractive candidate pathway for  
262 understanding the regulation of autogeny. For example, *ilp1* and *ilp5* are downregulated in  
263 diapausing *Cx. pipiens* females, which shuts down their ovarian maturation (Sim and Denlinger,  
264 2009). RNAi knock-down of *ilp1* also results in cessation of ovarian development in females not  
265 programmed for diapause (Sim and Denlinger, 2009). Furthermore, ILP3 promotes ovarian  
266 maturation in both the autogenous *G. atropalpus* (Gulia-Nuss et al., 2012), as well as  
267 anautogenous *Ae. aegypti* following a blood meal (Brown et al., 2008). Brain medial  
268 neurosecretory cells are the dominant source of ILP expression not only in mosquitoes, but in  
269 insects in general (reviewed by Okamoto and Yamanaka, 2015). While ILP activity is controlled  
270 primarily by the release of these neuropeptides into the hemolymph, we predicted that  
271 genetically encoded regulatory changes between *Culex* bioforms could affect transcription  
272 levels, and subsequently, ILP activity. Therefore, we expected to see upregulation of *ilps*,  
273 especially *ilp3*, in the heads of *molestus* females, with the strongest upregulation occurring in  
274 those that were well-fed.

275 Females of both bioforms expressed *ilp1*, *ilp2*, *ilp3*, *ilp4* and *ilp6* in the head tissues,  
276 regardless of larval feeding conditions (Fig. 4A-E, Fig. 6). *ilp5* was the only insulin-like peptide  
277 that was undetectable in the head (data not shown). Expression of *ilp1* and *ilp6* increased over  
278 time but did so to the same extent in all groups, showing no correlation with autogenous egg  
279 production (Fig. 4A and E). Expression levels of *ilp1*, *ilp3*, *ilp4*, and *ilp6* did not differ between  
280 bioforms or feeding conditions in head tissues (Fig. 4A-E), even though ILP3 release from the  
281 brain is associated with mosquito reproduction in other systems (Brown et al., 2008). One  
282 exception was that *ilp1* expression was significantly different between well-fed and poorly-fed  
283 *molestus* at 48-72h PE ( $\log_2 = -0.57$  vs.  $0.5$ ,  $p = 0.018$ )(Fig. 4A). This likely reflects a slight  
284 delay initiating upregulation of *ilp1* in poorly-fed *molestus*, which is ultimately upregulated in  
285 both diet treatments at 72-96h PE ( $\log_2 = 1.67$  vs.  $1.94$ ). Interestingly, *ilp2* experienced a ten-  
286 fold downregulation in well-fed *molestus* at 24-48h PE vs. well-fed *pipiens* at the same time  
287 point ( $\log_2 = -3.03$  vs.  $\log_2 = 0.33$ ,  $p = 0.014$ ), and more modest downregulation in poorly-fed  
288 *molestus* ( $\log_2 = -1.64$ )(Fig. 4B). The downstream effector of ILP signaling, *foxo*, was also  
289 detected in all head samples (Fig. 4F). Well-fed *molestus* downregulated *foxo* by nine-fold at  
290 24-48h PE with respect to equivalently staged *pipiens* ( $\log_2 = -2.7$  vs.  $0.47$ ,  $p = 0.021$ ) and at  
291 48-72h PE ( $\log_2 = -1.81$  vs.  $1.31$ ,  $p = 0.023$ ). Weaker downregulation of *foxo* was observed in  
292 poorly-fed *molestus* at those same time points ( $\log_2 = -1.57$  and  $-0.52$ ).

293 We also screened abdominal tissues as a potential alternative source of *ilp* expression.  
294 While not as well-known, there is a precedent for *ilp* expression originating from ovaries, fat  
295 body, and other abdominal tissues in many diverse insects (Okada et al., 2019; Okamoto et al.,  
296 2009a, 2009b). Insects can express ILPs directly from their fat bodies to signal nutritional  
297 conditions in a post-feeding stage. For example, in the beetle *Gnatocerus cornutus*, instead of  
298 the fat body signaling to the brain to synthesize and release ILPs in response to nutritional input,  
299 the fat body directly produces ILP to stimulate post-feeding growth (Okada et al., 2019). In  
300 mosquitoes, ILP expression of abdominal origin has also been characterized. For example,

301 expression of ILP4 and ILP7 are detectable in ovary tissue in *Aedes* (Riehle et al., 2006).  
302 Furthermore, in female *Anopheles gambiae*, an antibody against ILP1/3/4 detected expression  
303 in abdominal ganglia that run along the body wall (Marquez et al., 2011). This same study  
304 identified ILP1/3/4 immunoreactivity in neuronal axons along the midgut and observed changes  
305 in the expression of several ILPs in the abdomen and midgut in response to sugar deprivation  
306 and exposure to human insulin via a bloodmeal. We reasoned that *ilps* of similar abdominal or  
307 neural origin may be expressed in *molestus* prior to bloodfeeding and quantified gene  
308 expression in whole abdomens (Fig. 5). *ilp1* was significantly upregulated at 72-96h PE in both  
309 well and poorly-nourished *molestus* ( $\log_2 = 1.5$  and  $1.37$  respectively) with respect to well-fed  
310 *pipiens* of the same age ( $\log_2 = -1.78$ ) ( $p = 0.0014$  vs.  $p = 0.02$ ) (Fig. 5A). *ilp3* expression  
311 increased 53-fold in well-fed *molestus* compared to well-fed *pipiens* at 48-72h PE ( $\log_2 = 1.91$   
312 vs.  $-3.83$ ,  $p = 0.003$ ). The *ilp3* expression level differences between well-fed *molestus* and  
313 *pipiens* gradually rose to 97-fold by 72-96h PE ( $\log_2 = 3.39$  vs.  $-3.21$ ,  $p = 0.0002$ ) (Fig. 5C).  
314 Poorly-nourished *molestus* significantly upregulated *ilp3* starting at 48-72h PE (16-fold,  $\log_2 =$   
315  $0.24$ ,  $p = 0.048$ ), but expression levels did not reach those of well-fed *molestus* until 72h PE  
316 (60-fold,  $\log_2 = 2.71$ ,  $p = 0.002$ ). Oddly, the expression of *ilp3* in *molestus* was not significantly  
317 different when compared to poorly nourished *pipiens*. No differences in *ilp2*, *ilp4* or *ilp6*  
318 expression were observed between bioforms or feeding conditions (Fig. 5B-F). Finally, as was  
319 the case for head tissues, *foxo* expression was also briefly downregulated in the abdomens of  
320 well-fed *molestus*. We observed over three-fold lower expression in well-fed *molestus* vs. well-  
321 fed *pipiens* at 0-24h PE ( $\log_2 = -1.86$  vs.  $0$ ,  $p = 0.040$ ) (Fig. 5G).

322 Interestingly, *ilp5* was only expressed in abdominal tissues, and primarily by the *pipiens*  
323 bioform (Fig. 5E). Predominantly abdominal expression is conserved in *Aedes* and *Anopheles*  
324 mosquitoes (Krieger et al., 2004; Riehle et al., 2006), so it was unsurprising that *ilp5* was not  
325 detectable in head tissues. At any given time, expression was three to five times lower in  
326 *molestus* than well-fed *pipiens* of the same stage ( $\log_2$  on average was approximately  $-2$  vs  $0$ ,  $p$

327 < 0.05 in each case). While expression was equally low in *molestus* irrespective of nutritional  
328 regimen, in *pipiens*, poor nutrition was associated with modest, but not significant, upregulation  
329 of *ilp5*. These form and dietary differences in *ilp5* expression are especially intriguing. Previous  
330 work found that the expression of *ilp5* was associated with a non-diapause state in *Culex*  
331 *pipiens* (Sim and Denlinger, 2009). Indeed, one of the primary differences between the *pipiens*  
332 and *molestus* bioforms is the ability to undergo diapause (Denlinger and Armbruster, 2014;  
333 Vinogradova, 2000), although it is notable that knock-down of ILP5 had no effect on diapause  
334 phenotypes in previous work (Sim and Denlinger, 2009). Currently, the functional role of *ilp5* in  
335 *pipiens* is not well understood, but clues from *Aedes* suggest it is critical to acquisition of teneral  
336 reserves. For example, CRISPR-Cas9 ablation of *ilp5* in *Aedes* resulted in bigger mosquitoes  
337 with larger stores of lipids accumulated during larval stages (Ling and Raikhel, 2018). Because  
338 increases in female size and teneral reserves are critical for autogeny (Chambers and Klowden,  
339 1994; Gulia-Nuss et al., 2015; Telang et al., 2006), the significant reduction in *ilp5* expression  
340 that we observed in the *molestus* bioform is potentially important for explaining a gain of  
341 autogenic ability.

342 To summarize our major findings for insulin signaling pathway genes, we observed brief  
343 downregulation of *ilp2* and *foxo* in the heads of females beginning at 24h PE. Upregulation of  
344 *ilp1* and *ilp3* occurred in the abdomens of *molestus* females after 48h PE, the latter of which  
345 experienced more dramatic upregulation. Abdominal expression of *foxo* was mildly  
346 downregulated in well-fed *molestus* females. Interestingly, *ilp5*, whose function is currently not  
347 well understood in *Cx. pipiens*, was only detected in the abdominal tissue, and strongly  
348 downregulated in *molestus* throughout the course of our experiment.

349 We then determined the time course of *Vg1b* expression to determine whether insulin-  
350 signaling pathway genes could be regulators of its expression. In anautogenous systems, *Vg*  
351 expression is repressed until a bloodmeal is acquired (Hansen et al., 2014). FOXO is the  
352 downstream effector of insulin signaling. It is a forkhead box transcription factor that represses

353 the expression of *Vg* in many insects until the insulin signaling pathway is activated (Sheng et  
354 al., 2011). Insulin signaling triggers phosphorylation of FOXO and deportation from the nucleus  
355 to the cytoplasm, relieving the repression of *Vg* genes. In *molestus*, *Vg1b* was strongly  
356 upregulated ( $p < 0.0001$ ) in abdominal tissues immediately upon eclosion in well-nourished  
357 samples and by 24-48h PE in poorly-nourished samples (Fig. 5H). Well-fed and poorly-fed  
358 *molestus* were significantly different at 0-24h PE ( $p = 0.011$ ), owing to the delayed onset of  
359 upregulation that occurs in the poorly-fed sample. This agreed well with previous work in *Cx.*  
360 *tarsalis* which demonstrated robust upregulation of this gene within a day of emergence in  
361 autogenous females (Provost-Javier et al., 2010). Both well- and poorly-nourished *molestus*  
362 samples ultimately attained changes in expression greater than 65,000 times that of newly  
363 eclosed *pipiens*. It is notable that *Vg1b* expression peaked at 24-48h PE ( $\log_2 = 15.29$ ) in well-  
364 fed *molestus* but was delayed until 48-72h PE ( $\log_2 = 16$ ) in poorly-fed *molestus*. No  
365 upregulation occurs in *pipiens* in any feeding condition or at any time point (Fig. 5H).  
366 Interestingly, *Vg1b* is detected before adulthood in *Cx. tarsalis*, and in *Ae. albopictus*, *Vg* has an  
367 additional role in repressing blood-seeking behavior in young, sugar-fed females (Dittmer et al.,  
368 2019; Provost-Javier et al., 2010). We can infer that peak *Vg* transcription must occur before  
369 48h PE because ovary maturation is visible by this point (Fig. 2). It may also be that very early  
370 upregulation of *Vg1b* serves to block blood-seeking behavior prior to or in addition to egg-  
371 producing functions.

372 We next examined expression patterns of insulin-signaling pathway genes in light of  
373 *Vg1b*'s temporal dynamics. An early-acting difference of potential importance for rapid *Vg1b*  
374 activation was the downregulation of *foxo* in 0-24h PE well-fed *molestus* abdomens.  
375 Downregulation of this conserved repressor of vitellogenesis genes could make it easier to  
376 activate *Vg1b* expression without bloodmeal-induced activation, even though it is typically  
377 regulated at the post-transcriptional level. However, the difference was only seen in well-fed  
378 *molestus* while autogeny occurred in both feeding regimens. Downregulation of *ilp5* also

379 occurred early in *molestus*, but was observed in both diets tested, making it a better candidate  
380 regulator of *Vg1b*. While significantly upregulated in the abdomens of *molestus* females, *ilp1*  
381 and *ilp3* are not likely to be involved in upregulation of *Vg1b*. We did not observe form-specific  
382 expression differences at these genes until after autogenic egg production was in progress (Fig.  
383 5A, 5C, Fig. 6). *ilp3* was not significantly upregulated until 48h PE in well-fed *molestus* and did  
384 not achieve a similar fold increase until 72h PE in poorly-fed *molestus*. By this point, *Vg1b*  
385 expression had passed its peak in both feeding conditions. Likewise, upregulation of *ilp1*  
386 specific to *molestus* did not occur until 72h PE. It may still reinforce the process once it is in  
387 progress since this *ilp* gene has already been shown to regulate ovarian development in *Culex*  
388 mosquitoes. Knock-down of expression of ILP1 has been demonstrated to halt ovarian  
389 development in non-diapausing *pipiens* and lower endogenous expression levels are observed  
390 in diapausing females (Sim and Denlinger, 2009). It is possible that changes in *ilp1* and *ilp3*  
391 expression have some important function in autogeny unrelated to *Vg1b* activation that will be  
392 determined by additional functional studies.

393 In *Aedes*, OEH, a neuroparsin type neuropeptide, activates the insulin signaling pathway  
394 in response to a bloodmeal, but bypasses the insulin receptor to do so (Dhara et al., 2013).  
395 More recent work demonstrated ecdysone signaling influences *ilp* expression in response to a  
396 bloodmeal, suggesting that it could also be important during autogeny (Ling and Raikhel, 2021).  
397 Based on previous predictions, we expected that OEH stimulation of egg production would be a  
398 conserved feature of mosquito reproduction (Vogel et al., 2015). We measured expression of  
399 OEH in the heads of females from both forms for 0-96h PE, with the expectation that it would be  
400 uniquely upregulated in *molestus* females. We did not detect expression in abdomens during  
401 pilot experiments. Although it was implicated in autogenous reproduction in other mosquito  
402 species (Brown et al., 2008; Dhara et al., 2013; Gulia-Nuss et al., 2015, 2012), OEH underwent  
403 very modest upregulation in the heads of *molestus* females throughout our time course relative  
404 to equivalently-staged *pipiens* (Fig. 4G, Fig. 6). OEH upregulation in the heads of *molestus*



405 females preparing for autogenous egg production occurred after *Vg1b* upregulation and was not  
406 statistically significant compared to expression in equivalent-staged *pipiens* females (Fig. 4G,  
407 Fig. 6). In *G. atropalpus*, ecdysteroid is secreted by the ovaries immediately upon eclosion and  
408 peaks during the first day of emergence under high-food conditions, and experience a ~12 hour  
409 delay of peak secretion under low-food conditions (Telang et al., 2006). This is controlled by  
410 OEH from the brain released within 6 hours of eclosion and produced during pupation and the  
411 first few hours post-eclosion (Fuchs et al., 1980; Gulia-Nuss et al., 2012). It is possible that our  
412 wide 0-24 hour sampling window prevented detection of this early peak in OEH expression, or  
413 that OEH peak expression occurs during pupation for *molestus*. It may also be that OEH  
414 activity is predominantly regulated by release of peptide, and that transcriptional regulation is  
415 not a good indicator of its potential role in *molestus* autogeny.

416         Here, we characterized the effects of nutrition on time to pupation, autogenous egg  
417 production, and expression of genes connected to sensing of nutritional state in *Cx. pipiens*.  
418 We confirmed that genetic factors interacted with nutritional status to regulate autogenous egg  
419 production in *molestus*, while even well-fed *pipiens* never produced eggs autogenously. In  
420 agreement with this trait expression data, we observed strong and significant bioform-specific  
421 gene expression differences, which were only mildly influenced by nutrition. The comparison  
422 between autogenous *molestus* and anautogenous *pipiens* revealed changes in gene expression  
423 patterns in the abdomen (*ilp1*, *ilp3*, *ilp5*), head (*ilp2*), or both (*foxo*) (Fig. 6). Some of these  
424 coincided with dramatic upregulation of *Vg1b* (ex. *foxo*, *ilp5*), while others occurred afterward  
425 (ex. *ilp1*, *ilp3*). Gene expression differences in well- vs. poorly-nourished *molestus* could be  
426 characterized as dampened or delayed rather than statistically significant changes in  
427 expression, in agreement with incomplete loss of autogeny in our lowest diet treatment. Future  
428 work on the functional consequences of these gene expression differences, especially that of  
429 *ilp5*, will enhance our understanding of the evolution of autogeny and loss of diapause as  
430 bioform-specific traits.

431

## 432 **Data Availability**

433 Scripts and data used to examine expression of autogeny under different dietary conditions can  
434 be found at [https://github.com/mcadamme/Culex\\_Nutrition\\_Exp](https://github.com/mcadamme/Culex_Nutrition_Exp). Data from gene expression  
435 analysis can be found at: link to be added following acceptance.

436

## 437 **Experimental Procedures**

### 438 *Gene identification and orthology*

439 We identified six *Culex ilp* genes by performing a HMMR analysis in Vectorbase  
440 (<https://legacy.vectorbase.org/hmmer>) using an alignment of all eight *Drosophila* and *Aedes ilps*  
441 against the CpipJ2.4 geneset (Arensburger et al., 2010; Giraldo-Calderón et al., 2015). We next  
442 constructed phylogenetic trees to establish gene orthology. Putative *Culex* ILPs plus previously  
443 characterized insect ILP sequences were aligned in MUSCLE  
444 (<https://www.ebi.ac.uk/Tools/msa/muscle/>)(Edgar, 2004). Tree topology was determined by  
445 TOPALI v2.5 using both a MrBayes algorithm (Model: JTT + G, Runs: 2 Generations: 500000,  
446 Sample Freq.: 10, Burnin: 25%) and maximum PhyML algorithm (Model: JTT + G, 100  
447 bootstrap runs)(Anisimova and Gascuel, 2006; Milne et al., 2004; Ronquist and Huelsenbeck,  
448 2003). Synteny of *ilp* genes was examined using Genomicus Metazoa (web-code version: 2014-  
449 07-06, database version: 30.01, [https://www.genomicus.biologie.ens.fr/genomicus-metazoa-](https://www.genomicus.biologie.ens.fr/genomicus-metazoa-30.01/cgi-bin/search.pl)  
450 [30.01/cgi-bin/search.pl](https://www.genomicus.biologie.ens.fr/genomicus-metazoa-30.01/cgi-bin/search.pl))(Louis et al., 2013).

451

### 452 *Mosquitoes*

453 A below-ground population (form *molestus*) of *Cx. pipiens* was obtained from Calumet,  
454 IL, and has been in colony since 2009 (Mutebi and Savage, 2009) and maintained following  
455 Fritz et al. (Fritz et al., 2015, 2014). An above-ground population (form *pipiens*) of *Cx. pipiens*  
456 was obtained from Evanston, IL, and has been in colony since 2016 (Noreuil and Fritz 2021).

457 Our laboratory-reared *molestus* had been cultured for 8 years without requiring a blood meal,  
458 but our *pipiens* never produced egg rafts prior to blood feeding during its 2 years in culture. All  
459 adults and larvae were maintained in an environmental chamber with a L:D photo period of  
460 16h:8h, temperature of  $25\pm 1^\circ\text{C}$ , and humidity of  $50\pm 10\%$ . Adults for each form were kept in  
461 separate 60 x 60 x 60 cm white BugDorm-2 insect rearing cages (Megaview Science Education  
462 Services Co., Taichung, Taiwan) and were provided with a 10% sucrose solution at all times.

463

#### 464 *Imaging of ovarian development*

465 Pupae were picked from respective larval rearing pans, placed in individual tubes until  
466 eclosion, then moved to cages containing a 10% sucrose resource where females were allowed  
467 to age with or without males for one to four days. Ovaries were dissected under a  
468 stereomicroscope (Olympus Corporation, model SZ61, Center Valley, PA, USA) at 3.0-4.5 X  
469 magnification on a petri dish filled with 70% ethanol. Images were made using the Olympus  
470 cellSens Entry microscope-mounted imaging system.

471

#### 472 *Impacts of genotype and nutrition on survivorship, larval development and ovarian maturation*

473 To produce sufficient mosquitoes for experimentation, each colony was blood fed at 12-  
474 14 days of age using an artificial membrane feeder. Goose blood (Na-heparinated, obtained  
475 from Lampire Biological) sweetened with 50% sucrose solution (8:1 ratio) was provided through  
476 a pork sausage casing for a minimum of 1 hour. Approximately 72 hours after blood feeding  
477 females were provided with a cup of dechlorinated tap water and allowed to lay eggs for 48  
478 hours. For each colony, the resulting egg rafts were placed in 27.0 x 19.4 x 9.5 cm plastic pans  
479 with 800ml of dechlorinated tap water and were supplied with 0.16g of liver powder (BD  
480 Difco™ Desiccated, Powdered Beef Liver) and 0.08g of powdered inactive dry yeast (Genesee  
481 Scientific) suspended in 8ml of RO water. After 48 hours, 60 individuals from each colony were  
482 placed in one of four diet treatments using a 3mL plastic transfer pipette. Those treatments were

483 as follows: extra low (0.25mg desiccated liver powder (LP), 0.14mg dry yeast (DY), 4ml RO  
484 water per larva), low (0.53mg LP, 0.27mg DY, 4ml RO water per larva), medium (0.80mg LP,  
485 0.40mg DY, 4ml RO water per larva), and high (1.07mg LP, 0.53mg DY, 4ml RO water per  
486 larva). To avoid competition between individuals, larvae were placed in a single well of a 12-well  
487 culture plate. This resulted in 5 plates (12 x 5 = 60 individuals) per treatment, per form. Plates  
488 were held in an environmental chamber with the same conditions as described above.  
489 Individuals were fed every other day. Diet fed on days subsequent to the initial loading of the  
490 plates contained the same mass of food as described above but was suspended in 100µl of RO  
491 water instead of 4ml. Water was changed completely, and the diet was re-loaded as initially  
492 described at day 8 or 10 of the experiment to avoid build-up of waste within each well. The  
493 number of pupae present was recorded daily, and mortality was recorded every other day  
494 during feeding. Pupae were removed from the well and placed in a small plastic cup within a 30  
495 x 30 x 30 white Bugdorm-2 cage. Adults were provided with a 10% sucrose solution and held  
496 under the previously described environmental conditions. Wing and ovarian dissections were  
497 performed on adult females, beginning at 4 days PE. A single wing was removed from each of  
498 3 females per diet treatment, per form and photographed using an Olympus cellSens Entry  
499 microscope-mounted imaging system. Wing length measurements were made from the allular  
500 notch to the tip of the wing using ImageJ software (Schneider et al., 2012). Ovaries were also  
501 removed from at least 20 *molestus* females and 5 *pipiens* females per diet treatment, and the  
502 numbers of follicles advanced beyond Christopher's stage IIb present were recorded (O'Meara  
503 and Krasnick, 1970). This experiment was repeated four times.

504 In a separate experiment, we measured the impacts of diet, form, and sex on larval  
505 development time. For each bioform and diet treatment (high or extra low), 60 larvae were  
506 placed into wells of the five 12-well cell culture plates and allowed to develop as described  
507 above. Upon pupation, individuals were transferred to a 2ml clear plastic lysis tube plugged

508 with cotton wool. We monitored emergence every 48h and scored both larval development time  
509 and sex of the emerged adult. This experiment was repeated three times.

510

#### 511 *Statistical analysis of mortality, pupation, and ovarian maturation*

512 Bayesian generalized linear models (GLMs) were always fit using the package BRMS (v.  
513 2.12.0 (Bürkner, 2017)) in R (R Core Team, 2016). Posterior probability distributions of model  
514 parameters were estimated using Markov Chain Monte Carlo (MCMC). For each model, we ran  
515 4 chains with 6,000 steps, a burn-in of 2,000 steps, and saved every other step resulting in a  
516 total of 8,000 samples drawn from the posterior probability distribution. To ensure a stable  
517 sampling distribution had been reached, we visually examined trace plots, estimated effective  
518 sample size, and calculated Gelman and Rubin's convergence diagnostic (Gelman and Rubin,  
519 1992). Details of the models and their underlying distributions can be found in Tables S1-6, S8-  
520 11, and S13-16.

521

#### 522 *RNA isolation and qPCR*

523 To compare gene expression levels between species, developmental time points, and  
524 nutritional states, we first extracted total RNA from pools of tissue derived from ten like  
525 individuals using TRIzol Reagent (Invitrogen, Carlsbad, CA) according to the manufacturer's  
526 instructions. Larvae from each bioform were reared individually in 12-well cell culture plates and  
527 fed either high or extra-low diet treatments. Pupae were placed in individual 2mL lysis tubes,  
528 allowed to emerge, and adult females were collected every 24 hours. From these females,  
529 replicate pools of ten heads (bearing intact chemosensory appendages) and ten abdomens  
530 were separately dissected on a small petri dish filled with dry ice for each diet treatment. Pooled  
531 tissue was stored in sterile 1.5 mL microcentrifuge tubes containing TRIzol Reagent at -80°C  
532 until RNA isolation was performed. One minor modification to this is that we back-extracted the  
533 aqueous RNA-containing layer with chloroform an additional time to remove trace amounts of

534 TRIZOL components that interfered with downstream steps. Once the resultant RNA pellet was  
535 dissolved in 20  $\mu$ L of nuclease-free water, the RNA was treated to remove residual genomic  
536 DNA contamination with the Turbo DNA-free kit (Invitrogen, Carlsbad, CA) according to the  
537 manufacturer's protocol. RNA yield was assessed following genomic DNA removal using a  
538 Nanodrop Lite spectrophotometer (Thermo Fisher Scientific, Waltham, MA). 250ng of RNA was  
539 used to synthesize cDNA with the iScript kit (BioRad, Hercules, CA). cDNA was diluted five-fold  
540 in nuclease-free water for use as a qPCR template, and total RNA was diluted to an equivalent  
541 dilution factor (2ng/ $\mu$ L) for –RT controls. qPCR was performed on a LightCycler 480 real-time  
542 PCR cycler (Roche, Basel, CH) using Luna Universal qPCR master mix (NEB, Ipswich, MA).  
543 Primer sequences can be found in Table S17. Results were analyzed by the  $\Delta\Delta$ Ct method  
544 (Livak and Schmittgen, 2001). Reference gene (*EF1A*) was selected using the Normfinder  
545 algorithm (Andersen et al., 2004) from a panel of six candidate reference genes selected from  
546 relevant literature (Ling and Salvaterra, 2011; Sim and Denlinger, 2009; Van Hiel et al., 2009).  
547 Statistical significance of qPCR data determined by 2-way ANOVA of  $\Delta\Delta$ Cts with Tukey's  
548 multiple comparisons test using Graphpad software.

549 **References**

550

551 Andersen, C.L., Jensen, J.L., Ørntoft, T.F., 2004. Normalization of Real-Time Quantitative  
552 Reverse Transcription-PCR Data: A Model-Based Variance Estimation Approach to  
553 Identify Genes Suited for Normalization, Applied to Bladder and Colon Cancer Data  
554 Sets. *Cancer Res.* 64, 5245–5250. <https://doi.org/10.1158/0008-5472.CAN-04-0496>

555 Anisimova, M., Gascuel, O., 2006. Approximate likelihood-ratio test for branches: A fast,  
556 accurate, and powerful alternative. *Syst. Biol.* 55, 539–552.  
557 <https://doi.org/10.1080/10635150600755453>

558 Arensburger, P., Megy, K., Waterhouse, R.M., Abrudan, J., Amedeo, P., Antelo, B.,  
559 Bartholomay, L., Bidwell, S., Caler, E., Camara, F., Campbell, C.L., Campbell, K.S.,  
560 Casola, C., Castro, M.T., Chandramouliswaran, I., Chapman, S.B., Christley, S., Costas,  
561 J., Eisenstadt, E., Feschotte, C., Fraser-Liggett, C., Guigo, R., Haas, B., Hammond, M.,  
562 Hansson, B.S., Hemingway, J., Hill, S.R., Howarth, C., Ignell, R., Kennedy, R.C., Kodira,  
563 C.D., Lobo, N.F., Mao, C., Mayhew, G., Michel, K., Mori, A., Liu, N., Naveira, H., Nene,  
564 V., Nguyen, N., Pearson, M.D., Pritham, E.J., Puiu, D., Qi, Y., Ranson, H., Ribeiro,  
565 J.M.C., Roberston, H.M., Severson, D.W., Shumway, M., Stanke, M., Strausberg, R.L.,  
566 Sun, C., Sutton, G., Tu, Z.J., Tubio, J.M.C., Unger, M.F., Vanlandingham, D.L., Vilella,  
567 A.J., White, O., White, J.R., Wondji, C.S., Wortman, J., Zdobnov, E.M., Birren, B.,  
568 Christensen, B.M., Collins, F.H., Cornel, A., Dimopoulos, G., Hannick, L.I., Higgs, S.,  
569 Lanzaro, G.C., Lawson, D., Lee, N.H., Muskavitch, M.A.T., Raikhel, A.S., Atkinson,  
570 P.W., 2010. Sequencing of *Culex quinquefasciatus* establishes a platform for mosquito  
571 comparative genomics. *Science* 330, 86–88. <https://doi.org/10.1126/science.1191864>

572 Aslamkhan, M., Laven, H., 1970. Inheritance of autogeny in the *Culex pipiens* complex. *Pak. J.*  
573 *Zool.* 2, 121–147.

574 Attardo, G.M., Hansen, I.A., Raikhel, A.S., 2005. Nutritional regulation of vitellogenesis in  
575 mosquitoes: Implications for anautogeny. *Insect Biochem. Mol. Biol., Genetic*  
576 *manipulation of insects* 35, 661–675. <https://doi.org/10.1016/j.ibmb.2005.02.013>

577 Brogiolo, W., Stocker, H., Ikeya, T., Rintelen, F., Fernandez, R., Hafen, E., 2001. An  
578 evolutionarily conserved function of the *Drosophila* insulin receptor and insulin-like  
579 peptides in growth control. *Curr. Biol. CB* 11, 213–221. [https://doi.org/10.1016/s0960-](https://doi.org/10.1016/s0960-9822(01)00068-9)  
580 [9822\(01\)00068-9](https://doi.org/10.1016/s0960-9822(01)00068-9)

581 Brown, M.R., Clark, K.D., Gulia, M., Zhao, Z., Garczynski, S.F., Crim, J.W., Suderman, R.J.,  
582 Strand, M.R., 2008. An insulin-like peptide regulates egg maturation and metabolism in  
583 the mosquito *Aedes aegypti*. *Proc. Natl. Acad. Sci. U. S. A.* 105, 5716–5721.  
584 <https://doi.org/10.1073/pnas.0800478105>

585 Bürkner, P.-C., 2017. brms: An R Package for Bayesian Multilevel Models Using Stan. *J. Stat.*  
586 *Softw.* 80, 1–28. <https://doi.org/10.18637/jss.v080.i01>

587 Casasa, S., Moczek, A.P., 2018. Insulin signalling's role in mediating tissue-specific nutritional  
588 plasticity and robustness in the horn-polyphenic beetle *Onthophagus taurus*. *Proc. R.*  
589 *Soc. B Biol. Sci.* 285, 20181631. <https://doi.org/10.1098/rspb.2018.1631>

590 Chambers, G.M., Klowden, M.J., 1994. Nutritional Reserves of Autogenous and Anautogenous  
591 Selected Strains of *Aedes albopictus* (Diptera: Culicidae). *J. Med. Entomol.* 31, 554–  
592 560. <https://doi.org/10.1093/jmedent/31.4.554>

593 Chandra, V., Fetter-Pruneda, I., Oxley, P.R., Ritger, A.L., McKenzie, S.K., Libbrecht, R.,  
594 Kronauer, D.J.C., 2018. Social regulation of insulin signaling and the evolution of  
595 eusociality in ants. *Science* 361, 398–402. <https://doi.org/10.1126/science.aar5723>

596 Clifton, M.E., Noriega, F.G., 2012. The fate of follicles after a blood meal is dependent on  
597 previtellogenic nutrition and juvenile hormone in *Aedes aegypti*. *J. Insect Physiol.* 58,  
598 1007–1019. <https://doi.org/10.1016/j.jinsphys.2012.05.005>

599 Colombani, J., Andersen, D.S., Léopold, P., 2012. Secreted peptide Dilp8 coordinates

- 600 *Drosophila* tissue growth with developmental timing. *Science* 336, 582–585.  
601 <https://doi.org/10.1126/science.1216689>
- 602 Denlinger, D.L., Armbruster, P.A., 2014. Mosquito diapause. *Annu. Rev. Entomol.* 59, 73–93.  
603 <https://doi.org/10.1146/annurev-ento-011613-162023>
- 604 Dhara, A., Eum, J.-H., Robertson, A., Gulia-Nuss, M., Vogel, K.J., Clark, K.D., Graf, R., Brown,  
605 M.R., Strand, M.R., 2013. Ovary ecdysteroidogenic hormone functions independently of  
606 the insulin receptor in the yellow fever mosquito, *Aedes aegypti*. *Insect Biochem. Mol.*  
607 *Biol.* 43, 1100–1108. <https://doi.org/10.1016/j.ibmb.2013.09.004>
- 608 Dittmer, J., Alafndi, A., Gabrieli, P., 2019. Fat body-specific vitellogenin expression regulates  
609 host-seeking behaviour in the mosquito *Aedes albopictus*. *PLOS Biol.* 17, e3000238.  
610 <https://doi.org/10.1371/journal.pbio.3000238>
- 611 Edgar, R.C., 2004. MUSCLE: multiple sequence alignment with high accuracy and high  
612 throughput. *Nucleic Acids Res.* 32, 1792–1797. <https://doi.org/10.1093/nar/gkh340>
- 613 Feinsod, F.M., Spielman, A., 1980. Nutrient-mediated juvenile hormone secretion in  
614 mosquitoes. *J. Insect Physiol.* 26, 113–117. [https://doi.org/10.1016/0022-](https://doi.org/10.1016/0022-1910(80)90050-5)  
615 [1910\(80\)90050-5](https://doi.org/10.1016/0022-1910(80)90050-5)
- 616 Fonseca, D.M., Keyghobadi, N., Malcolm, C.A., Mehmet, C., Schaffner, F., Mogi, M., Fleischer,  
617 R.C., Wilkerson, R.C., 2004. Emerging vectors in the *Culex pipiens* complex. *Science*  
618 303, 1535–1538. <https://doi.org/10.1126/science.1094247>
- 619 Fritz, M.L., Walker, E.D., Miller, J.R., Severson, D.W., Dworkin, I., 2015. Divergent host  
620 preferences of above- and below-ground *Culex pipiens* mosquitoes and their hybrid  
621 offspring. *Med. Vet. Entomol.* 29, 115–123. <https://doi.org/10.1111/mve.12096>
- 622 Fritz, M.L., Walker, E.D., Yunker, A.J., Dworkin, I., 2014. Daily blood feeding rhythms of  
623 laboratory-reared North American *Culex pipiens*. *J. Circadian Rhythms* 12, 1.  
624 <https://doi.org/10.1186/1740-3391-12-1>
- 625 Fuchs, M.S., Sundland, B.R., Kang, S.-H., 1980. In vivo induction of ovarian development in  
626 *Aedes atropalpus* by a head extract from *Aedes aegypti*. *Int. J. Invertebr. Reprod.* 2,  
627 121–129. <https://doi.org/10.1080/01651269.1980.10553347>
- 628 Garelli, A., Gontijo, A.M., Miguela, V., Caparros, E., Dominguez, M., 2012. Imaginal discs  
629 secrete insulin-like peptide 8 to mediate plasticity of growth and maturation. *Science*  
630 336, 579–582. <https://doi.org/10.1126/science.1216735>
- 631 Gelman, A., Rubin, D.B., 1992. Inference from Iterative Simulation Using Multiple Sequences.  
632 *Stat. Sci.* 7, 457–472. <https://doi.org/10.1214/ss/1177011136>
- 633 Giraldo-Calderón, G.I., Emrich, S.J., MacCallum, R.M., Maslen, G., Dialynas, E., Topalis, P.,  
634 Ho, N., Gesing, S., VectorBase Consortium, Madey, G., Collins, F.H., Lawson, D., 2015.  
635 VectorBase: an updated bioinformatics resource for invertebrate vectors and other  
636 organisms related with human diseases. *Nucleic Acids Res.* 43, D707-713.  
637 <https://doi.org/10.1093/nar/gku1117>
- 638 Grönke, S., Clarke, D.-F., Broughton, S., Andrews, T.D., Partridge, L., 2010. Molecular  
639 Evolution and Functional Characterization of *Drosophila* Insulin-Like Peptides. *PLOS*  
640 *Genet.* 6, e1000857. <https://doi.org/10.1371/journal.pgen.1000857>
- 641 Gulia-Nuss, M., Elliot, A., Brown, M.R., Strand, M.R., 2015. Multiple factors contribute to  
642 anaotogenous reproduction by the mosquito *Aedes aegypti*. *J. Insect Physiol.* 82, 8–16.  
643 <https://doi.org/10.1016/j.jinsphys.2015.08.001>
- 644 Gulia-Nuss, M., Eum, J.-H., Strand, M.R., Brown, M.R., 2012. Ovary ecdysteroidogenic  
645 hormone activates egg maturation in the mosquito *Georgacraigius atropalpus* after adult  
646 eclosion or a blood meal. *J. Exp. Biol.* 215, 3758–3767.  
647 <https://doi.org/10.1242/jeb.074617>
- 648 Hagedorn, H.H., O'Connor, J.D., Fuchs, M.S., Sage, B., Schlaeger, D.A., Bohm, M.K., 1975.  
649 The ovary as a source of alpha-ecdysone in an adult mosquito. *Proc. Natl. Acad. Sci. U.*  
650 *S. A.* 72, 3255–3259. <https://doi.org/10.1073/pnas.72.8.3255>



- 651 Hagedorn, H.H., Shapiro, J.P., Hanaoka, K., 1979. Ovarian ecdysone secretion is controlled by  
652 a brain hormone in an adult mosquito. *Nature* 282, 92–94.  
653 <https://doi.org/10.1038/282092a0>
- 654 Hansen, I.A., Attardo, G.M., Park, J.-H., Peng, Q., Raikhel, A.S., 2004. Target of rapamycin-  
655 mediated amino acid signaling in mosquito anautogeny. *Proc. Natl. Acad. Sci. U. S. A.*  
656 101, 10626–10631. <https://doi.org/10.1073/pnas.0403460101>
- 657 Hansen, I.A., Attardo, G.M., Rodriguez, S.D., Drake, L.L., 2014. Four-way regulation of  
658 mosquito yolk protein precursor genes by juvenile hormone-, ecdysone-, nutrient-, and  
659 insulin-like peptide signaling pathways. *Front. Physiol.* 5.  
660 <https://doi.org/10.3389/fphys.2014.00103>
- 661 Harbach, R.E., Harbach, R.E., Harrison, B.A., Gad, A.M., 1984. *Culex* (*Culex*) *Molestus* Forskål  
662 (Diptera: Culicidae): neotype designation, description, variation, and taxonomic status.  
663 *Proc. Entomol. Soc. Wash.* 86, 521–542.
- 664 Kassim, N.F.A., Webb, C.E., Russell, R.C., 2012. Is the expression of autogeny by *Culex*  
665 *molestus* Forskal (Diptera: Culicidae) influenced by larval nutrition or by adult mating,  
666 sugar feeding, or blood feeding? *J. Vector Ecol.* 37, 162–171.  
667 <https://doi.org/10.1111/j.1948-7134.2012.00213.x>
- 668 Kent, R.J., Harrington, L.C., Norris, D.E., 2007. Genetic Differences Between *Culex pipiens* f.  
669 *molestus* and *Culex pipiens pipiens* (Diptera: Culicidae) in New York. *J. Med. Entomol.*  
670 44, 50–59.
- 671 Krieger, M.J.B., Jahan, N., Riehle, M.A., Cao, C., Brown, M.R., 2004. Molecular characterization  
672 of insulin-like peptide genes and their expression in the African malaria mosquito,  
673 *Anopheles gambiae*. *Insect Mol. Biol.* 13, 305–315. <https://doi.org/10.1111/j.0962-1075.2004.00489.x>
- 674
- 675 Krishnamurthy, B.S., Laven, H., 1961. A Note on Inheritance of Autogeny in *Culex* Mosquitos.  
676 *Bull. World Health Organ.* 24, 675–677.
- 677 Ling, D., Salvaterra, P.M., 2011. Robust RT-qPCR Data Normalization: Validation and Selection  
678 of Internal Reference Genes during Post-Experimental Data Analysis. *PLoS ONE* 6.  
679 <https://doi.org/10.1371/journal.pone.0017762>
- 680 Ling, L., Raikhel, A.S., 2021. Cross-talk of insulin-like peptides, juvenile hormone, and 20-  
681 hydroxyecdysone in regulation of metabolism in the mosquito *Aedes aegypti*. *Proc. Natl.*  
682 *Acad. Sci.* 118. <https://doi.org/10.1073/pnas.2023470118>
- 683 Ling, L., Raikhel, A.S., 2018. Serotonin signaling regulates insulin-like peptides for growth,  
684 reproduction, and metabolism in the disease vector *Aedes aegypti*. *Proc. Natl. Acad. Sci.*  
685 115, E9822–E9831. <https://doi.org/10.1073/pnas.1808243115>
- 686 Livak, K.J., Schmittgen, T.D., 2001. Analysis of relative gene expression data using real-time  
687 quantitative PCR and the 2(-Delta Delta C(T)) Method. *Methods San Diego Calif* 25,  
688 402–408. <https://doi.org/10.1006/meth.2001.1262>
- 689 Louis, A., Muffato, M., Roest Crollius, H., 2013. Genomicus: five genome browsers for  
690 comparative genomics in eukaryota. *Nucleic Acids Res.* 41, D700-705.  
691 <https://doi.org/10.1093/nar/gks1156>
- 692 Lounibos, L.P., Van Dover, C., O'Meara, G.F., 1982. Fecundity, autogeny, and the larval  
693 environment of the pitcher-plant mosquito, *Wyeomyia smithii*. *Oecologia* 55, 160–164.  
694 <https://doi.org/10.1007/BF00384482>
- 695 Marquez, A.G., Pietri, J.E., Smithers, H.M., Nuss, A., Antonova, Y., Drexler, A.L., Riehle, M.A.,  
696 Brown, M.R., Luckhart, S., 2011. Insulin-like peptides in the mosquito *Anopheles*  
697 *stephensi*: Identification and expression in response to diet and infection with  
698 *Plasmodium falciparum*. *Gen. Comp. Endocrinol.* 173, 303–312.  
699 <https://doi.org/10.1016/j.ygcen.2011.06.005>
- 700 Milne, I., Wright, F., Rowe, G., Marshall, D.F., Husmeier, D., McGuire, G., 2004. TOPALi:  
701 software for automatic identification of recombinant sequences within DNA multiple

- 702 alignments. *Bioinforma. Oxf. Engl.* 20, 1806–1807.  
703 <https://doi.org/10.1093/bioinformatics/bth155>
- 704 Mori, A., Romero-Severson, J., Black, W.C., Severson, D.W., 2008. Quantitative trait loci  
705 determining autogeny and body size in the Asian tiger mosquito (*Aedes albopictus*).  
706 *Heredity* 101, 75–82. <https://doi.org/10.1038/hdy.2008.32>
- 707 Mostowy, W., Foster, W., 2004. Antagonistic effects of energy status on meal size and egg-  
708 batch size of *Aedes aegypti* (Diptera: Culicidae). *J. Vector Ecol. J. Soc. Vector Ecol.* 29,  
709 84–93.
- 710 Mutebi, J.-P., Savage, H.M., 2009. Discovery of *Culex pipiens pipiens* form *molestus* in  
711 Chicago. *J. Am. Mosq. Control Assoc.* 25, 500–503. <https://doi.org/10.2987/09-5910.1>
- 712 Nijhout, H.F., McKenna, K.Z., 2018. The distinct roles of insulin signaling in polyphenic  
713 development. *Curr. Opin. Insect Sci.* 25, 58–64.  
714 <https://doi.org/10.1016/j.cois.2017.11.011>
- 715 Noriega, F.G., 2004. Nutritional regulation of JH synthesis: a mechanism to control reproductive  
716 maturation in mosquitoes? *Insect Biochem. Mol. Biol., Molecular and population biology*  
717 *of mosquitoes* 34, 687–693. <https://doi.org/10.1016/j.ibmb.2004.03.021>
- 718 Okada, Y., Katsuki, M., Okamoto, N., Fujioka, H., Okada, K., 2019. A specific type of insulin-like  
719 peptide regulates the conditional growth of a beetle weapon. *PLOS Biol.* 17, e3000541.  
720 <https://doi.org/10.1371/journal.pbio.3000541>
- 721 Okamoto, N., Yamanaka, N., 2015. Nutrition-dependent control of insect development by  
722 insulin-like peptides. *Curr. Opin. Insect Sci., Global change biology \* Molecular*  
723 *physiology* 11, 21–30. <https://doi.org/10.1016/j.cois.2015.08.001>
- 724 Okamoto, N., Yamanaka, N., Satake, H., Saegusa, H., Kataoka, H., Mizoguchi, A., 2009a. An  
725 ecdysteroid-inducible insulin-like growth factor-like peptide regulates adult development  
726 of the silkworm *Bombyx mori*. *FEBS J.* 276, 1221–1232. [https://doi.org/10.1111/j.1742-](https://doi.org/10.1111/j.1742-4658.2008.06859.x)  
727 [4658.2008.06859.x](https://doi.org/10.1111/j.1742-4658.2008.06859.x)
- 728 Okamoto, N., Yamanaka, N., Yagi, Y., Nishida, Y., Kataoka, H., O'Connor, M.B., Mizoguchi, A.,  
729 2009b. A fat body-derived IGF-like peptide regulates postfeeding growth in *Drosophila*.  
730 *Dev. Cell* 17, 885–891. <https://doi.org/10.1016/j.devcel.2009.10.008>
- 731 O'Meara, G.F., 1985. Gonotrophic Interactions in Mosquitoes: Kicking the Blood-Feeding Habit.  
732 *Fla. Entomol.* 68, 122–133. <https://doi.org/10.2307/3494335>
- 733 O'meara, G.F., Jr, C., B, G., 1969. Monofactorial inheritance of autogeny in *Aedes atropalpus*.  
734 *Mosq. News* 29.
- 735 O'Meara, G.F., Krasnick, G.J., 1970. Dietary and Genetic Control of the Expression of  
736 Autogenous Reproduction in *Aedes Atropalpus* (Coq.) (Diptera: Culicidae)1. *J. Med.*  
737 *Entomol.* 7, 328–334. <https://doi.org/10.1093/jmedent/7.3.328>
- 738 Provost-Javier, K.N., Chen, S., Rasgon, J.L., 2010. Vitellogenin gene expression in autogenous  
739 *Culex tarsalis*. *Insect Mol. Biol.* 19, 423–429. [https://doi.org/10.1111/j.1365-](https://doi.org/10.1111/j.1365-2583.2010.00999.x)  
740 [2583.2010.00999.x](https://doi.org/10.1111/j.1365-2583.2010.00999.x)
- 741 R Core Team, 2016. R: A language and environment for statistical computing. R Foundation for  
742 Statistical Computing.
- 743 Riehle, M.A., Fan, Y., Cao, C., Brown, M.R., 2006. Molecular characterization of insulin-like  
744 peptides in the yellow fever mosquito, *Aedes aegypti*: expression, cellular localization,  
745 and phylogeny. *Peptides* 27, 2547–2560. <https://doi.org/10.1016/j.peptides.2006.07.016>
- 746 Riehle, M.A., Garczynski, S.F., Crim, J.W., Hill, C.A., Brown, M.R., 2002. Neuropeptides and  
747 Peptide Hormones in *Anopheles gambiae*. *Science* 298, 172–175.  
748 <https://doi.org/10.1126/science.1076827>
- 749 Ronquist, F., Huelsenbeck, J.P., 2003. MrBayes 3: Bayesian phylogenetic inference under  
750 mixed models. *Bioinformatics* 19, 1572–1574.  
751 <https://doi.org/10.1093/bioinformatics/btg180>
- 752 Roubaud, E., 1929. Autogenous Cycle of Winter Generations of *Culex pipiens* L. *C. r. Acad. Sci.*

- 753 188.
- 754 Roy, S., Smykal, V., Johnson, L., Saha, T.T., Zou, Z., Raikhel, A.S., 2016. Chapter Five -  
755 Regulation of Reproductive Processes in Female Mosquitoes, in: Raikhel, Alexander S.  
756 (Ed.), *Advances in Insect Physiology, Progress in Mosquito Research*. Academic Press,  
757 pp. 115–144. <https://doi.org/10.1016/bs.aaip.2016.05.004>
- 758 Roy, S.G., Hansen, I.A., Raikhel, A.S., 2007. Effect of insulin and 20-hydroxyecdysone in the fat  
759 body of the yellow fever mosquito, *Aedes aegypti*. *Insect Biochem. Mol. Biol.* 37, 1317–  
760 1326. <https://doi.org/10.1016/j.ibmb.2007.08.004>
- 761 Schneider, C. A., Rasband, W. S., Eliceiri, K. W., 2012. NIH Image to ImageJ: 25 years of  
762 image analysis. *Nat. Methods*, 9(7), 671–675.
- 763 Sharma, A., Nuss, A.B., Gulia-Nuss, M., 2019. Insulin-Like Peptide Signaling in Mosquitoes:  
764 The Road Behind and the Road Ahead. *Front. Endocrinol.* 10.  
765 <https://doi.org/10.3389/fendo.2019.00166>
- 766 Sheng, Z., Xu, J., Bai, H., Zhu, F., Palli, S.R., 2011. Juvenile Hormone Regulates Vitellogenin  
767 Gene Expression through Insulin-like Peptide Signaling Pathway in the Red Flour  
768 Beetle, *Tribolium castaneum*. *J. Biol. Chem.* 286, 41924–41936.  
769 <https://doi.org/10.1074/jbc.M111.269845>
- 770 Sim, C., Denlinger, D.L., 2009. A shut-down in expression of an insulin-like peptide, ILP-1, halts  
771 ovarian maturation during the overwintering diapause of the mosquito *Culex pipiens*.  
772 *Insect Mol. Biol.* 18, 325–332. <https://doi.org/10.1111/j.1365-2583.2009.00872.x>
- 773 Spielman, A., 2001. Structure and seasonality of nearctic *Culex pipiens* populations. *Ann. N. Y.*  
774 *Acad. Sci.* 951, 220–234. <https://doi.org/10.1111/j.1749-6632.2001.tb02699.x>
- 775 Spielman, A., 1957. The inheritance of autogeny in the *Culex pipiens* complex of mosquitoes..  
776 *Am. J. Epidemiol.* 65, 404–425. <https://doi.org/10.1093/oxfordjournals.aje.a119878>
- 777 Spielman, A., Wong, J., 1973. Environmental Control of Ovarian Diapause in *Culex pipiens*.  
778 <https://doi.org/10.1093/AESA/66.4.905>
- 779 Telang, A., Li, Y., Noriega, F.G., Brown, M.R., 2006. Effects of larval nutrition on the  
780 endocrinology of mosquito egg development. *J. Exp. Biol.* 209, 645–655.  
781 <https://doi.org/10.1242/jeb.02026>
- 782 Telang, A., Rechel, J.A., Brandt, J.R., Donnell, D.M., 2013. Analysis of ovary-specific genes in  
783 relation to egg maturation and female nutritional condition in the mosquitoes  
784 *Georgacraigius atropalpus* and *Aedes aegypti* (Diptera: Culicidae). *J. Insect Physiol.* 59,  
785 283–294. <https://doi.org/10.1016/j.jinsphys.2012.11.006>
- 786 Telang, A., Wells, M.A., 2004. The effect of larval and adult nutrition on successful autogenous  
787 egg production by a mosquito. *J. Insect Physiol.* 50, 677–685.  
788 <https://doi.org/10.1016/j.jinsphys.2004.05.001>
- 789 Trpis, M., 1978. Genetics of hematophagy and autogeny in the *Aedes scutellaris* complex  
790 (Diptera: Culicidae). *J. Med. Entomol.* 15, 73–80.  
791 <https://doi.org/10.1093/jmedent/15.1.73>
- 792 Tsuji, N., Okazawa, T., Yamamura, N., 1990. Autogenous and Anautogenous Mosquitoes: a  
793 Mathematical Analysis of Reproductive Strategies. *J. Med. Entomol.* 27, 446–453.  
794 <https://doi.org/10.1093/jmedent/27.4.446>
- 795 Van Hiel, M.B., Van Wielendaele, P., Temmerman, L., Van Soest, S., Vuerinckx, K.,  
796 Huybrechts, R., Broeck, J.V., Simonet, G., 2009. Identification and validation of  
797 housekeeping genes in brains of the desert locust *Schistocerca gregaria* under different  
798 developmental conditions. *BMC Mol. Biol.* 10, 56. <https://doi.org/10.1186/1471-2199-10-56>
- 800 Vinogradova, A.B., 2000. *Culex Pipiens Pipiens Mosquitoes: Taxonomy, Distribution, Ecology,*  
801 *Physiology, Genetics, Applied Importance and Control*. Pensoft Publishers, Sofia.
- 802 Vogel, K.J., Brown, M.R., Strand, M.R., 2015. Ovary ecdysteroidogenic hormone requires a  
803 receptor tyrosine kinase to activate egg formation in the mosquito *Aedes aegypti*. *Proc.*

804 Natl. Acad. Sci. 112, 5057–5062. <https://doi.org/10.1073/pnas.1501814112>  
805 Wheeler, D.E., Frederik Nijhout, H., 1983. Soldier determination in *Pheidole bicarinata*: Effect of  
806 methoprene on caste and size within castes. *J. Insect Physiol.* 29, 847–854.  
807 [https://doi.org/10.1016/0022-1910\(83\)90151-8](https://doi.org/10.1016/0022-1910(83)90151-8)  
808 Yurchenko, A.A., Masri, R.A., Khrabrova, N.V., Sibataev, A.K., Fritz, M.L., Sharakhova, M.V.,  
809 2020. Genomic differentiation and intercontinental population structure of mosquito  
810 vectors *Culex pipiens pipiens* and *Culex pipiens molestus*. *Sci. Rep.* 10.  
811 <https://doi.org/10.1038/s41598-020-63305-z>  
812 Zou, Z., Saha, T.T., Roy, S., Shin, S.W., Backman, T.W.H., Girke, T., White, K.P., Raikhel, A.S.,  
813 2013. Juvenile hormone and its receptor, methoprene-tolerant, control the dynamics of  
814 mosquito gene expression. *Proc. Natl. Acad. Sci.*  
815 <https://doi.org/10.1073/pnas.1305293110>  
816  
817  
818

819 **Tables**

820

821 **Table 1: Mean wing length is positively correlated with nutrient availability in larval *Cx.***  
822 ***pipiens*.** Means and standard deviations were calculated using one wing for 12 individuals per  
823 form, per diet treatment. Correlations between wing length and larval nutrition were determined  
824 using a Bayesian generalized linear model (Tables S3 & S4).  
825

| <b>Form</b>                             | <b>Diet Treatment</b> | <b>Mean Wing Length (mm)</b> | <b>Standard Deviation</b> |
|-----------------------------------------|-----------------------|------------------------------|---------------------------|
| <i>Cx. pipiens</i> form <i>molestus</i> | High                  | 3.43                         | 0.21                      |
|                                         | Medium                | 3.22                         | 0.10                      |
|                                         | Low                   | 3.06                         | 0.11                      |
|                                         | Extra Low             | 2.84                         | 0.09                      |
| <i>Cx. pipiens</i> form <i>pipiens</i>  | High                  | 3.66                         | 0.15                      |
|                                         | Medium                | 3.51                         | 0.16                      |
|                                         | Low                   | 3.32                         | 0.15                      |
|                                         | Extra Low             | 3.16                         | 0.14                      |

826

827 **Figures**

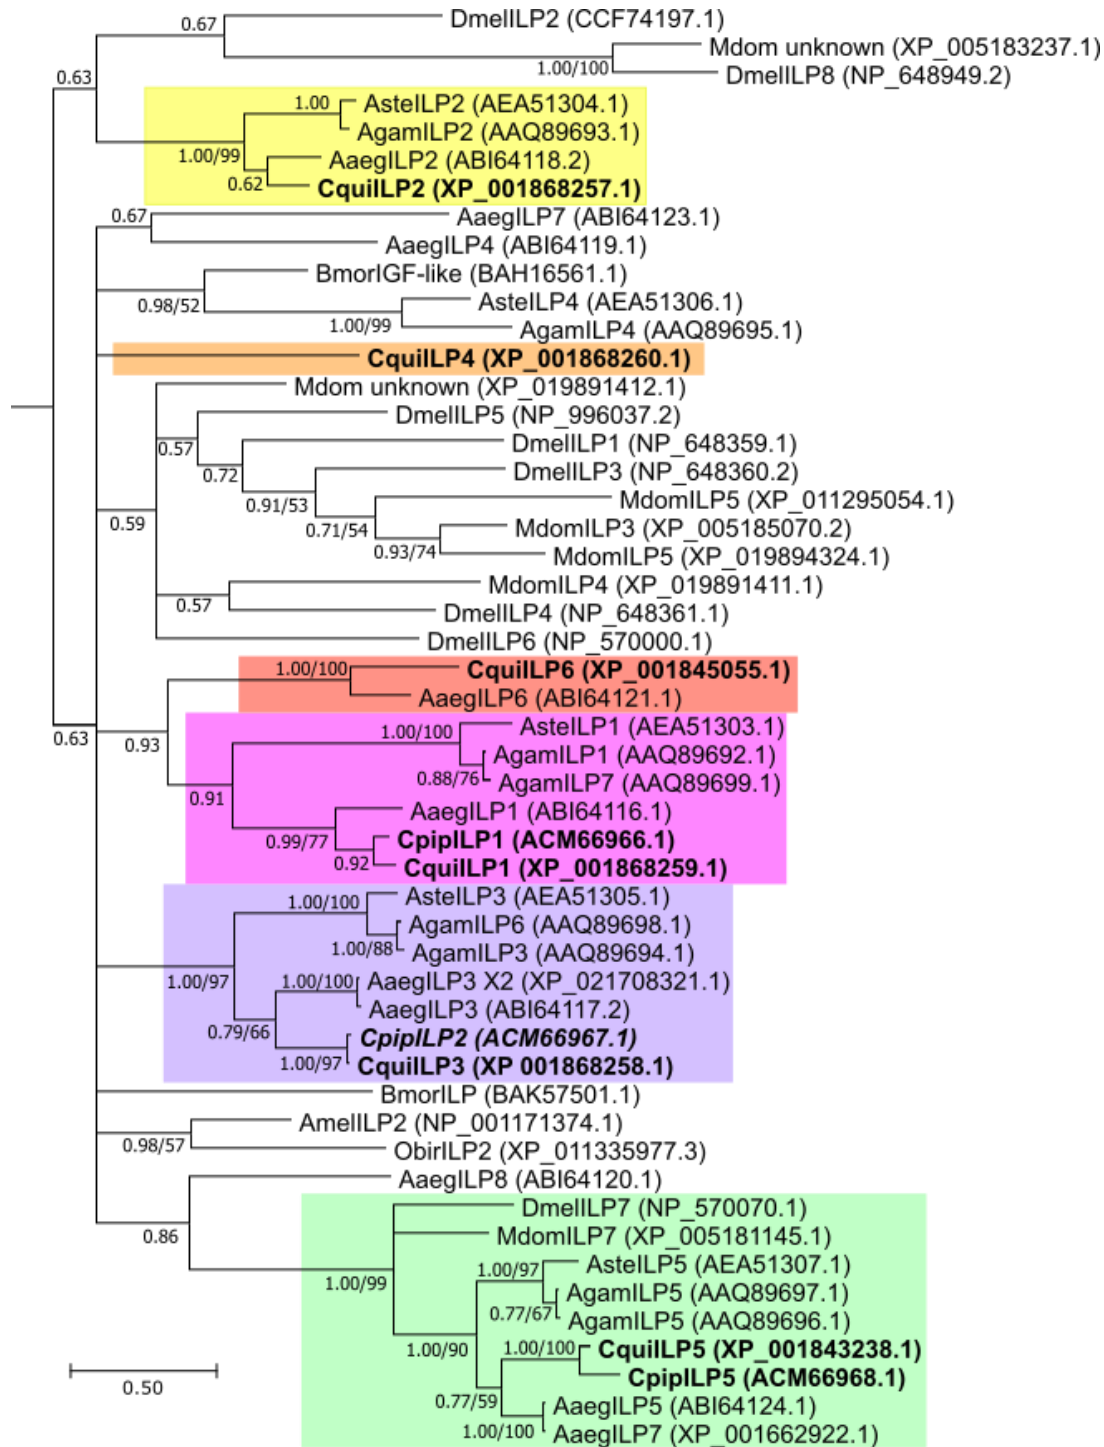

828

829 **Figure 1: Phylogenetic Tree of Dipteran ILPs establishes *Culex ilp* orthology.** Six distinct  
830 *Culex ilp* genes (bold) were assigned orthology based on clustering with their closest homologs  
831 in other species, indicated by colored boxes around each clade. *Cqui-ilp4* is a lineage-specific

832 gene with no homology to other Dipteran *ilp* genes (orange box). Only *Cqui-ilp5* has well  
833 supported orthology to a *Dmel-ilp* gene (*ilp7*) (green box). Tree topology determined by TOPALI  
834 v2.5 using a MrBayes algorithm. Posterior probabilities listed at nodes to indicate statistical  
835 support. When the node was also supported by a maximum likelihood tree (>50) (TOPALI,  
836 PhyML algorithm, JTT + G, 100 bootstrap runs), the bootstrap support is listed as the second  
837 value at the node. Genbank accession numbers listed next to gene names.

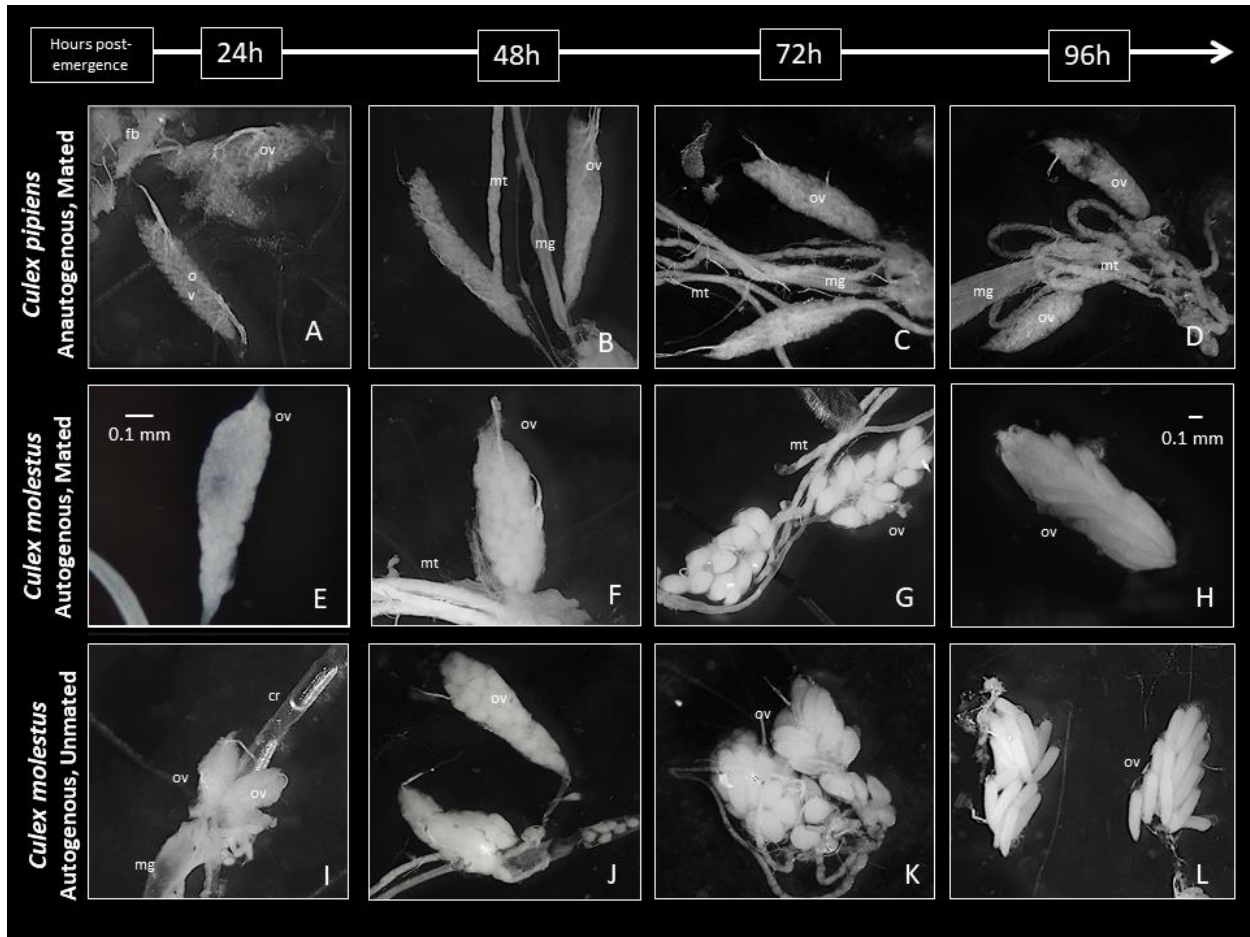

838

839 **Figure 2: Ovarian development up to 96 hours post adult emergence in anautogenous**  
840 ***pipiens* and autogenous *molestus* females.** Panels A-D depict ovarian development in  
841 anautogenous, form *pipiens* females in which follicles remain in resting stage (Christopher's  
842 Stage - IIb) until a blood meal is taken. Panels E-H depict autogenous ovarian development for  
843 form *molestus* females provided the opportunity to mate. Panels I-L show ovarian development  
844 in autogenous *molestus* females denied a mating opportunity. A 0.1 mm scale is shown in  
845 panels E and H for reference. ov, ovary; mg, midgut; fb, fatbody; mt, malpighian tubules; cr,  
846 crop.



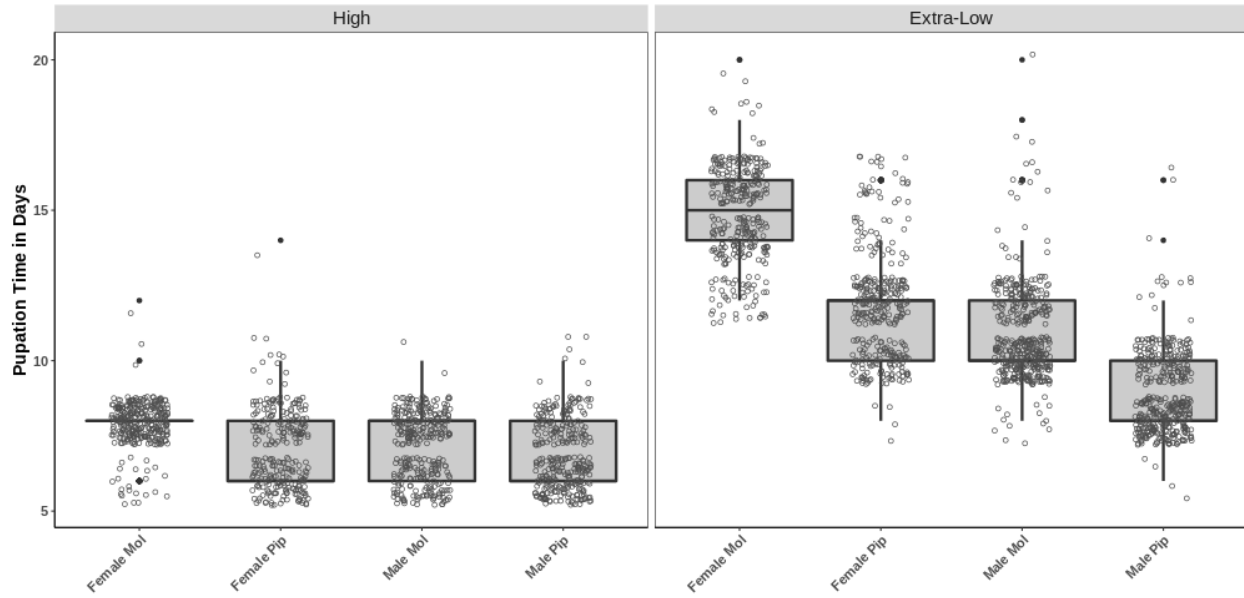

847

848 **Figure 3: Days until pupation, per treatment, for *molestus* and *pipiens*.** Males and females  
849 are shown separately. Unfilled points represent observations for individual larvae, while filled  
850 points represent outlier observations (1.5X greater or less than the interquartile range).

○ molestus low food    □ pipiens low food  
 ● molestus high food    ■ pipiens high food

\*  $p < 0.05$     \*\*\*  $p < 0.001$   
 \*\*  $p < 0.01$     \*\*\*\*  $p < 0.0001$   
 Significantly different than *pipiens* high at same timepoint

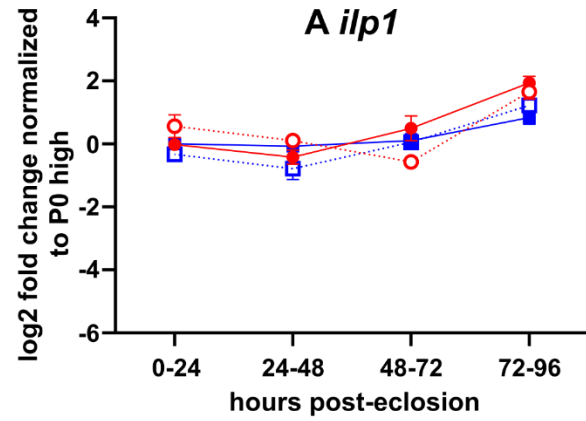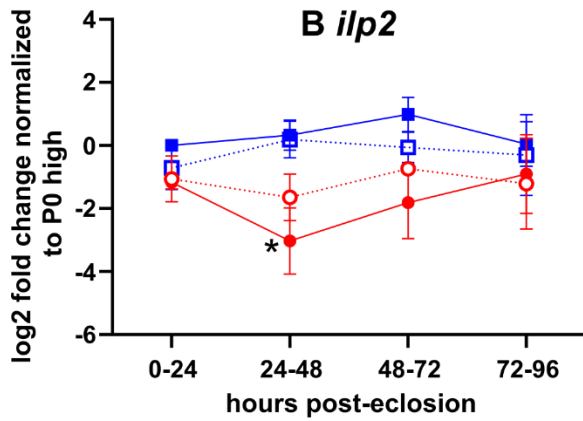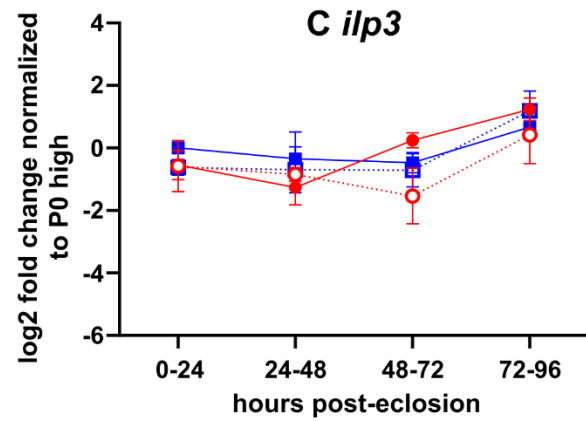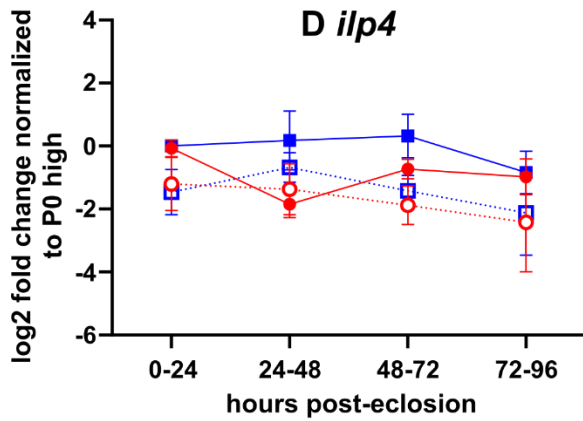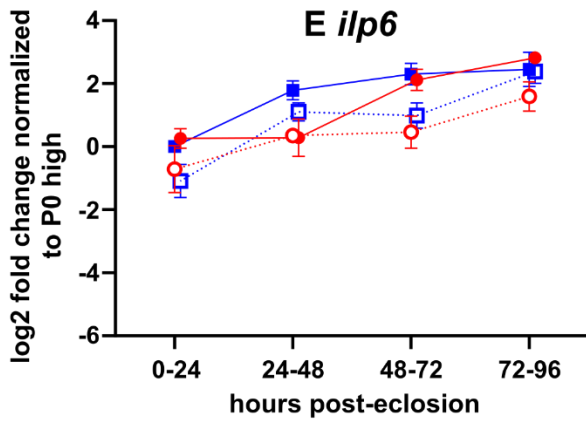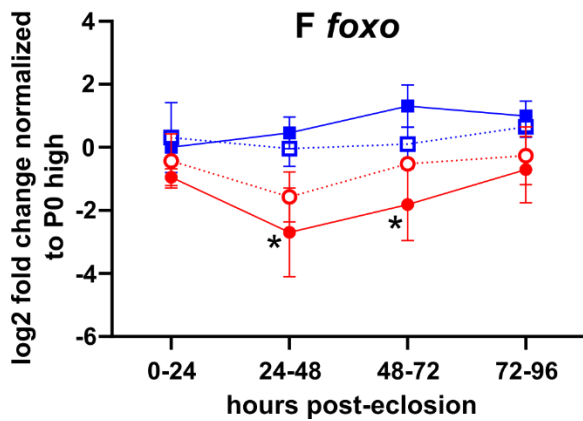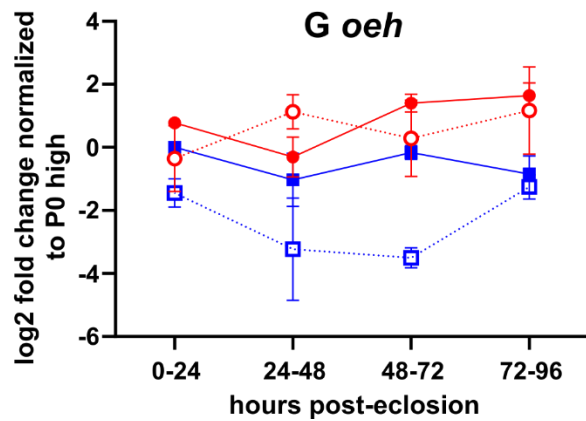

852 **Figure 4: Downregulation of *ilp2* and *foxo* in head tissues are correlated with autogeny**  
853 **phenotype.** qPCR was used to determine whether expression of *ilp1* (A), *ilp2* (B), *ilp3* (C), *ilp4*  
854 (D), *ilp6* (E), *foxo* (F), and *oeh* (G), differ between bioforms and feeding conditions over the first  
855 four days of adult development, when autogenous egg production occurs in *molestus*. Only *ilp2*  
856 (B) and *foxo* (F) are significantly differentially expressed, as determined by a two-way ANOVA  
857 of log<sub>2</sub> fold change values. p values are indicated by \*s as presented in the key. Fold change  
858 gene expression determined by  $\Delta\Delta\text{Ct}$  method, normalizing first to housekeeping gene *EF1a*,  
859 then to *pipiens* high food 0-24 hr reference sample. Data are shown on a log<sub>2</sub> scale such that  
860 “0” means no change vs. the reference sample. “High” and “low” indicate diet types used in  
861 larval rearing. Error bars indicate SEM. Each data point is the mean of 3-4 biological  
862 replicates.

○ molestus low food    □ pipiens low food  
 ● molestus high food    ■ pipiens high food

\* p < 0.05    \*\*\* p < 0.001  
 \*\* p < 0.01    \*\*\*\* p < 0.0001

Significantly different than *pipiens* high at same timepoint

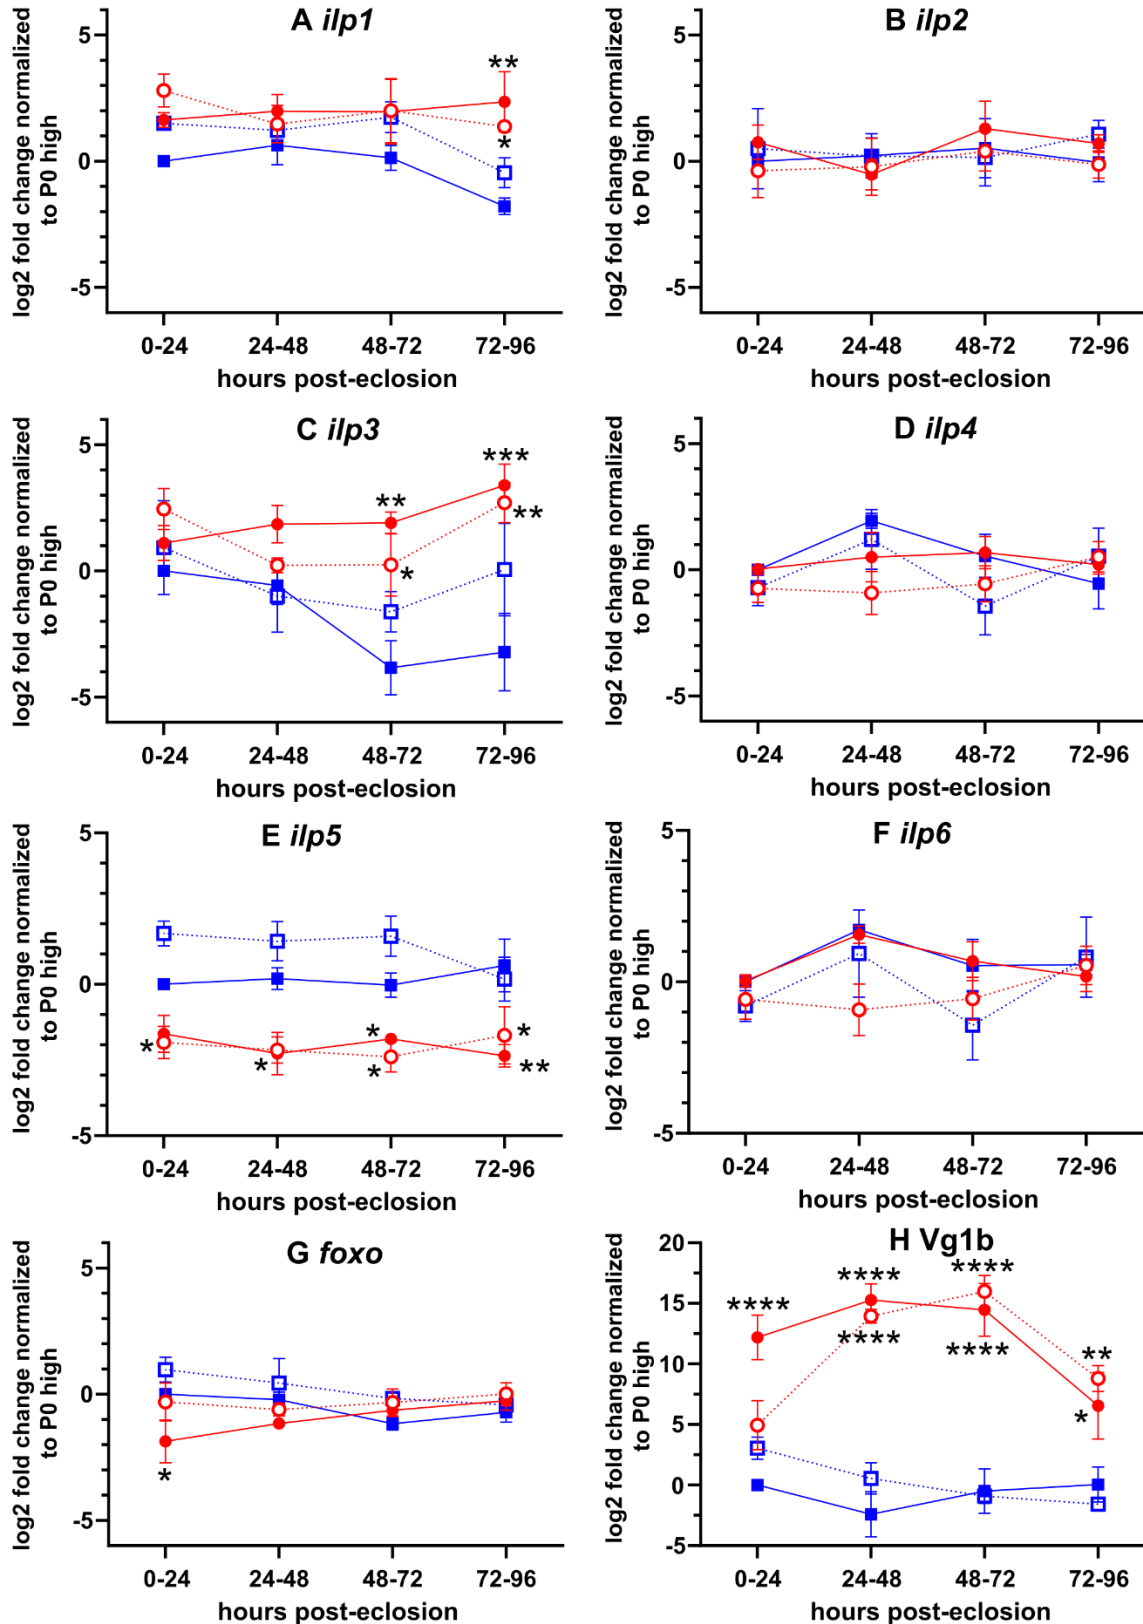

864 **Figure 5: Multiple gene expression differences in the abdomen correlate with autogeny**  
865 **phenotype when biotypes and feeding conditions are compared.** qPCR was used to  
866 determine whether expression of *ilp1* (A), *ilp2* (B), *ilp3* (C), *ilp4* (D), *ilp5* (E), *ilp6* (F), *foxo* (G),  
867 and *Vg1b* (H) differ between bioforms and feeding conditions over the first four days of adult  
868 development, when autogenous egg production occurs in *molestus*. *ilp1* is upregulated in  
869 *molestus* at 72-96 hrs post-eclosion (A). *ilp2* expression is stable between bioforms, feeding  
870 conditions and time points (B). *ilp3* is upregulated in *molestus* from 48-96 hrs post-eclosion (C).  
871 *ilp4* expression is stable between bioforms, feeding conditions and time points (D). *ilp5* is  
872 significantly downregulated at all timepoints in *molestus*, irrespective of feeding condition (E).  
873 *ilp6* expression is stable between bioforms, feeding conditions and time points (F). *foxo* is  
874 initially downregulated in well-fed *molestus* (G). *Vg1b* is enormously upregulated in *molestus*,  
875 but with a slight delay in onset in low-food conditions (H). p values are indicated by \*s as  
876 presented in the key. Fold change gene expression determined by  $\Delta\Delta\text{Ct}$  method, normalizing  
877 first to housekeeping gene *EF1a*, then to *pipiens* high food 0-24 hr reference sample. Data are  
878 shown on a log<sub>2</sub> scale such that “0” means no change vs. the reference sample. “High” and  
879 “low” indicate diet types used in larval rearing. Error bars indicate SEM. Each data point is the  
880 mean of 3-4 biological replicates.

881

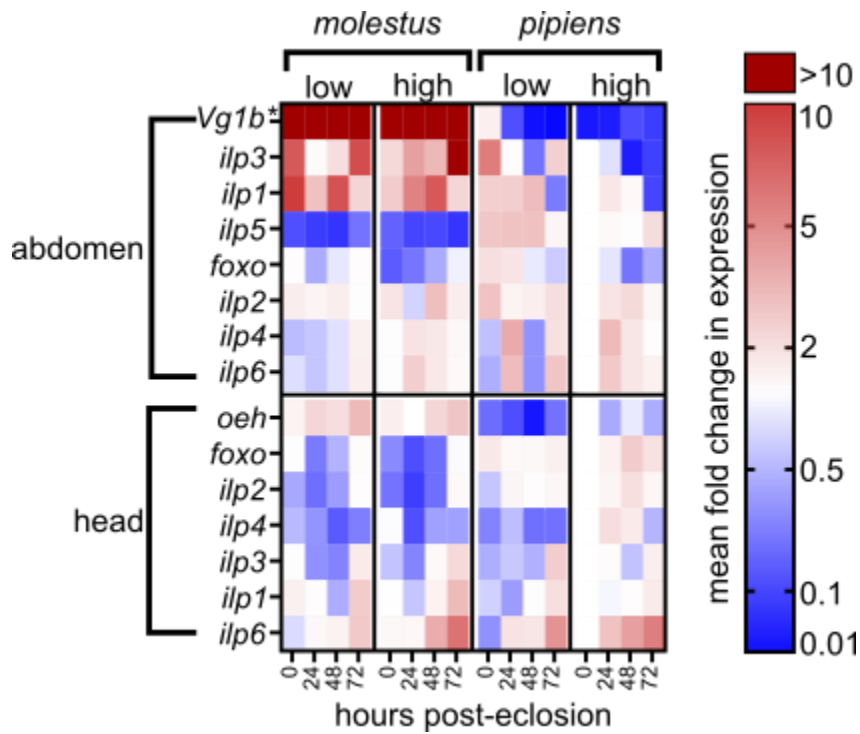

882

883 **Figure 6: Heat Map Summary of Fold Change Gene Expression.** Data from Figures 4 and 5  
884 shown as fold changes in expression (as opposed to log<sub>2</sub> scale in original figures) and are  
885 grouped to show genes that are up and downregulated during autogenic egg production (listed  
886 first in each grouping) vs. those that remain stable across forms (listed last in each grouping).  
887 \**Vg1b* expression is shown as 1/100th of actual fold change values to allow for visualization on  
888 the same scale as other measured genes.
